# Supplementary material for: Exploring the Effectiveness of Self-Management Interventions in Type 2 Diabetes: A Systematic Review and Network Meta-Analysis
Source: MDPI journal article supplement (doi:10.3390/healthcare12010027), 2023-12-22

## Appendix C. Funnel Plots

### a. Knowledge

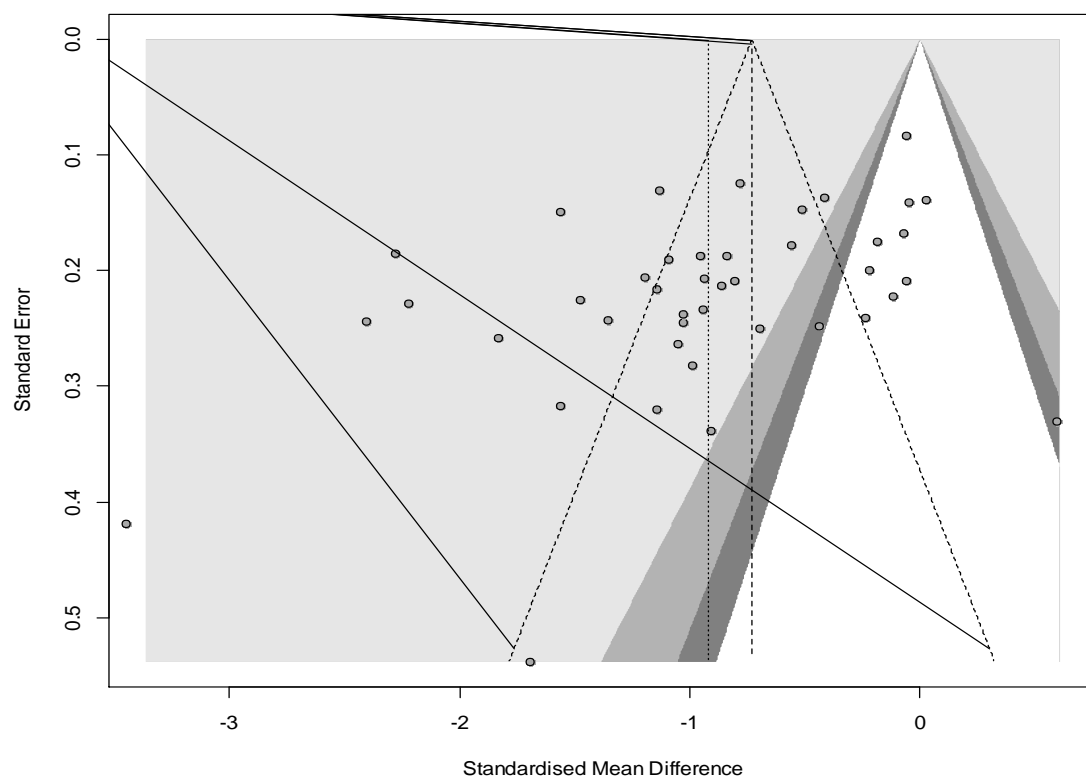

### b. Self-efficacy

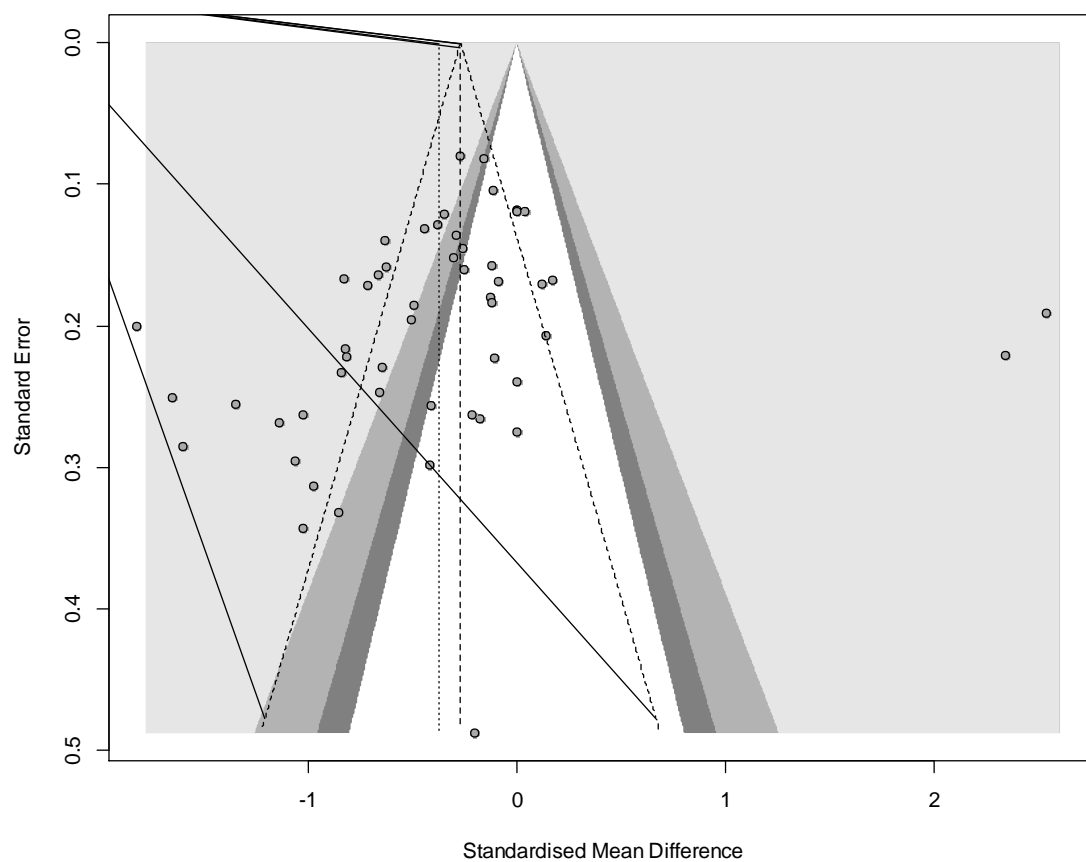

### c. Self-management behaviours

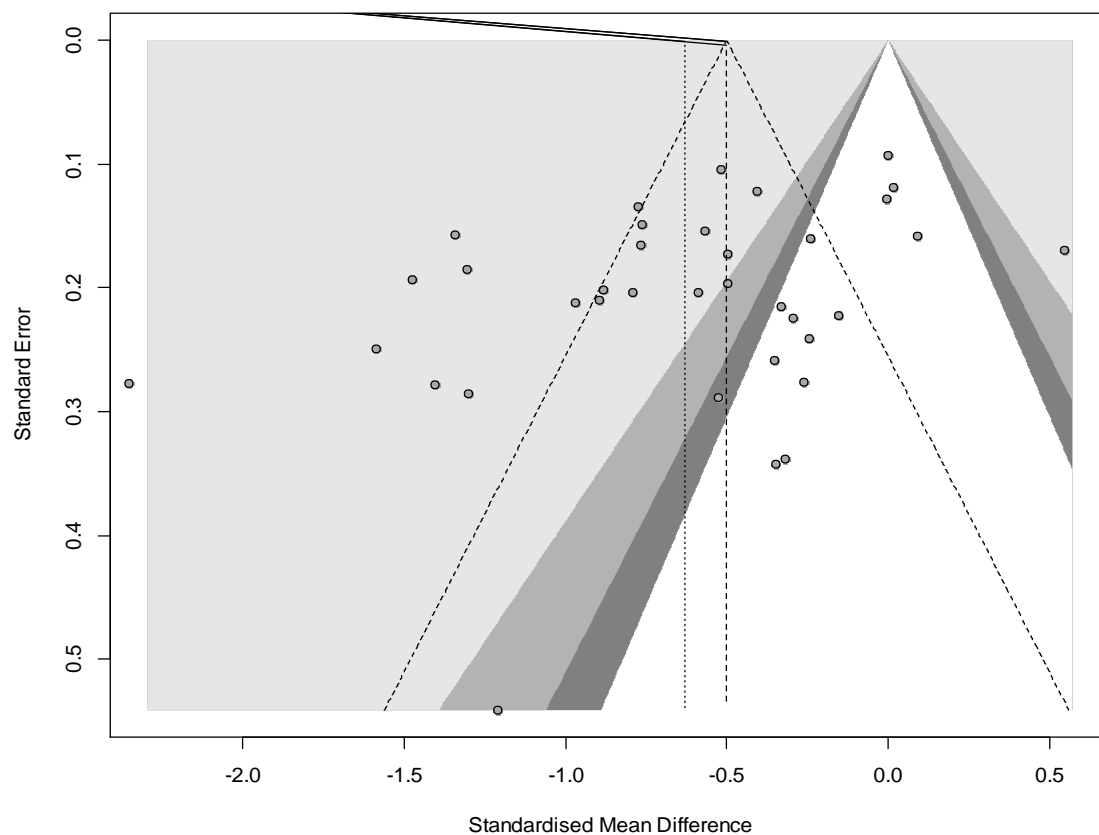

### d. Adherence

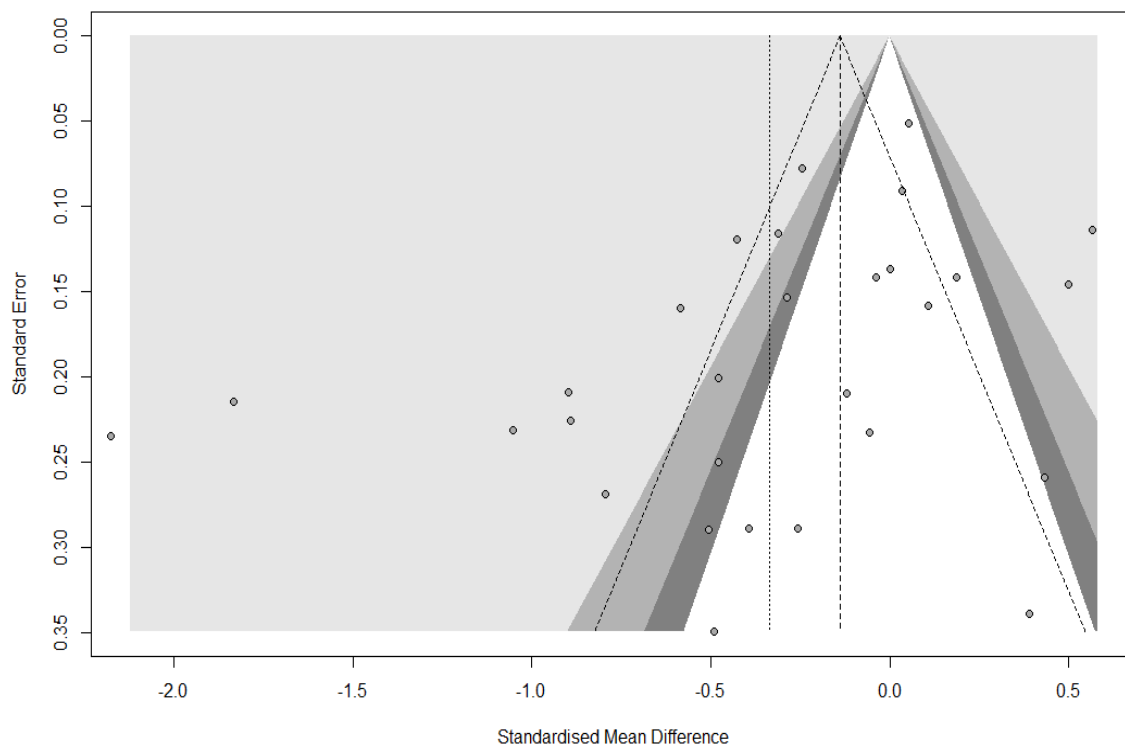

**e. Foot care**

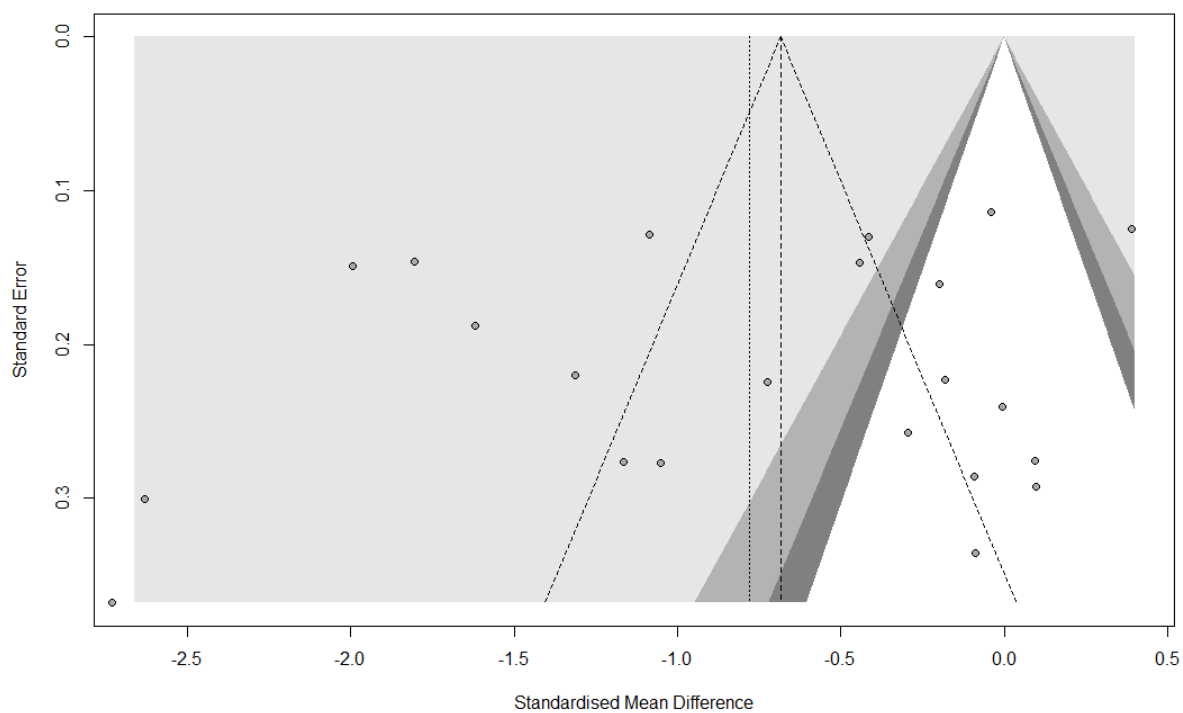

**f. Glucose Self-monitoring**

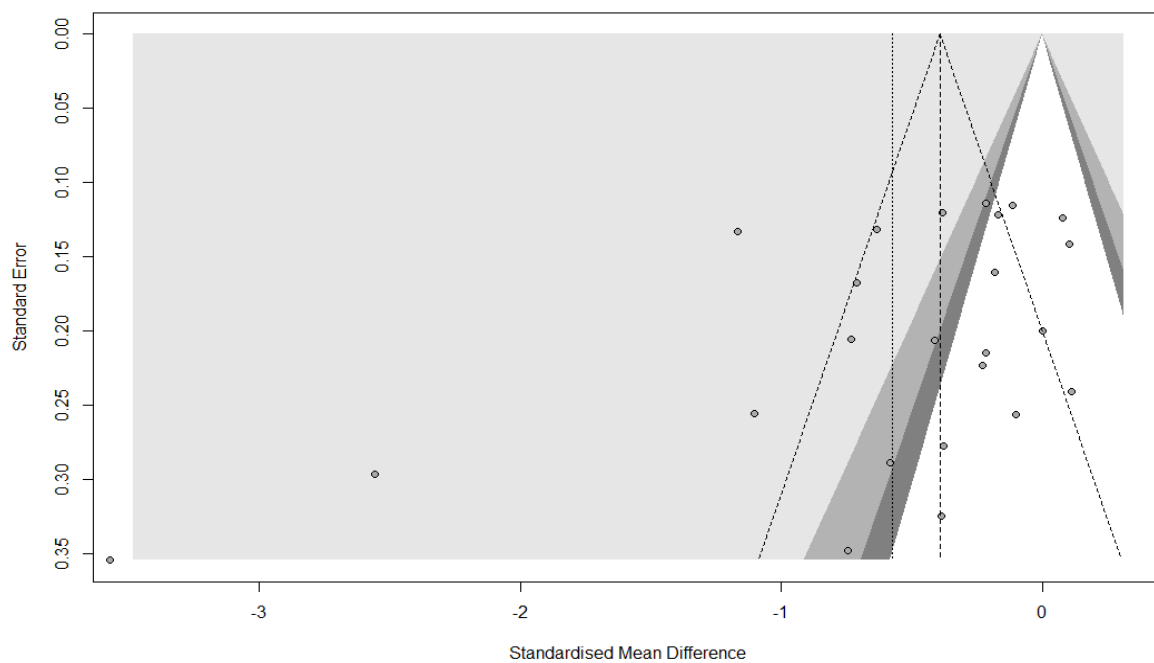

**g. Dietary habits**

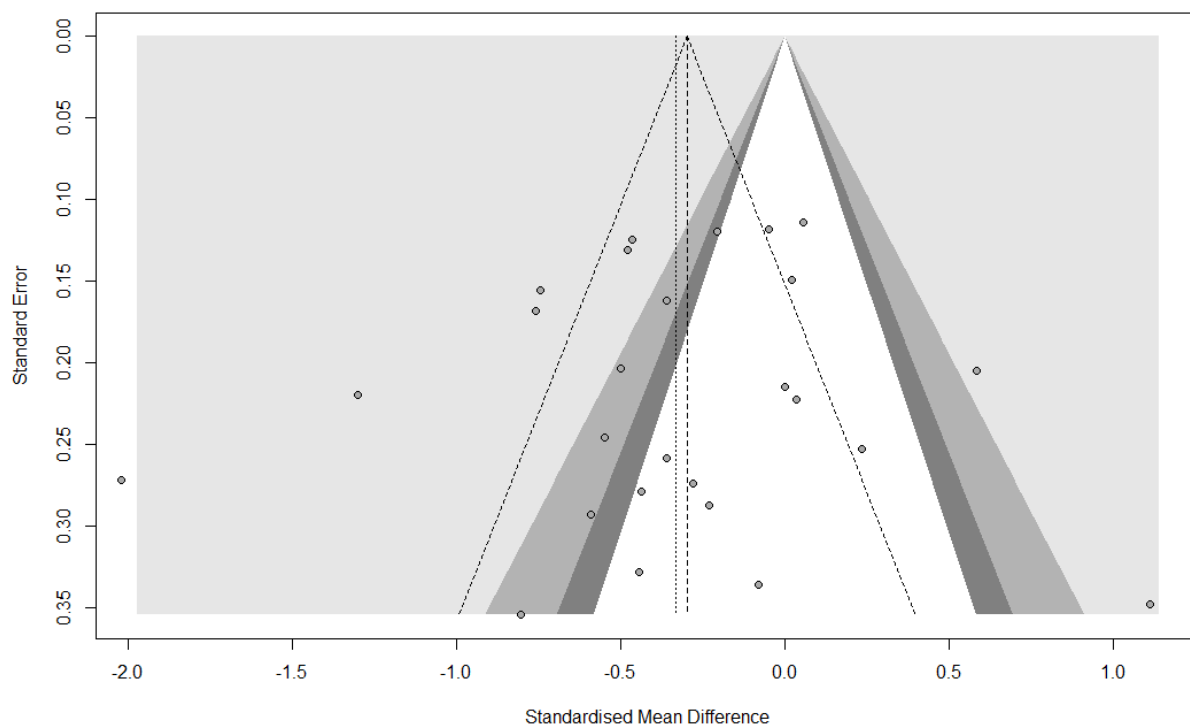

**h. Consumption of fat**

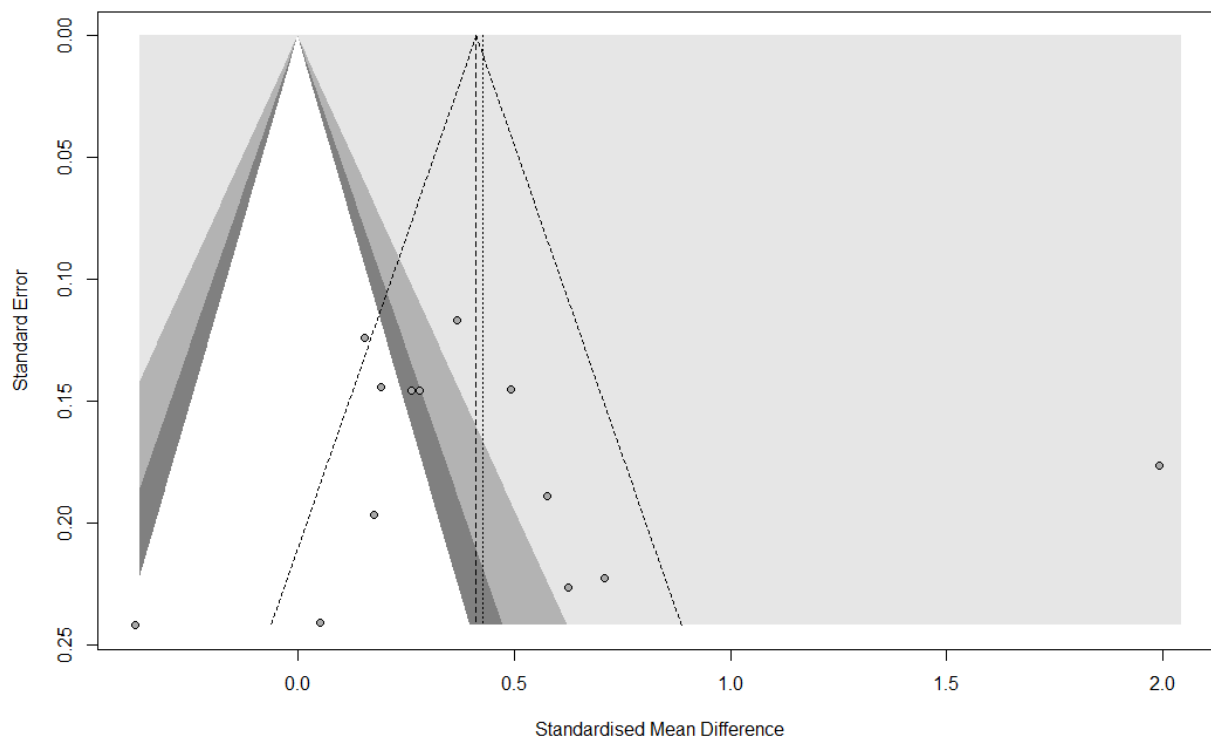

**i. Physical activity**

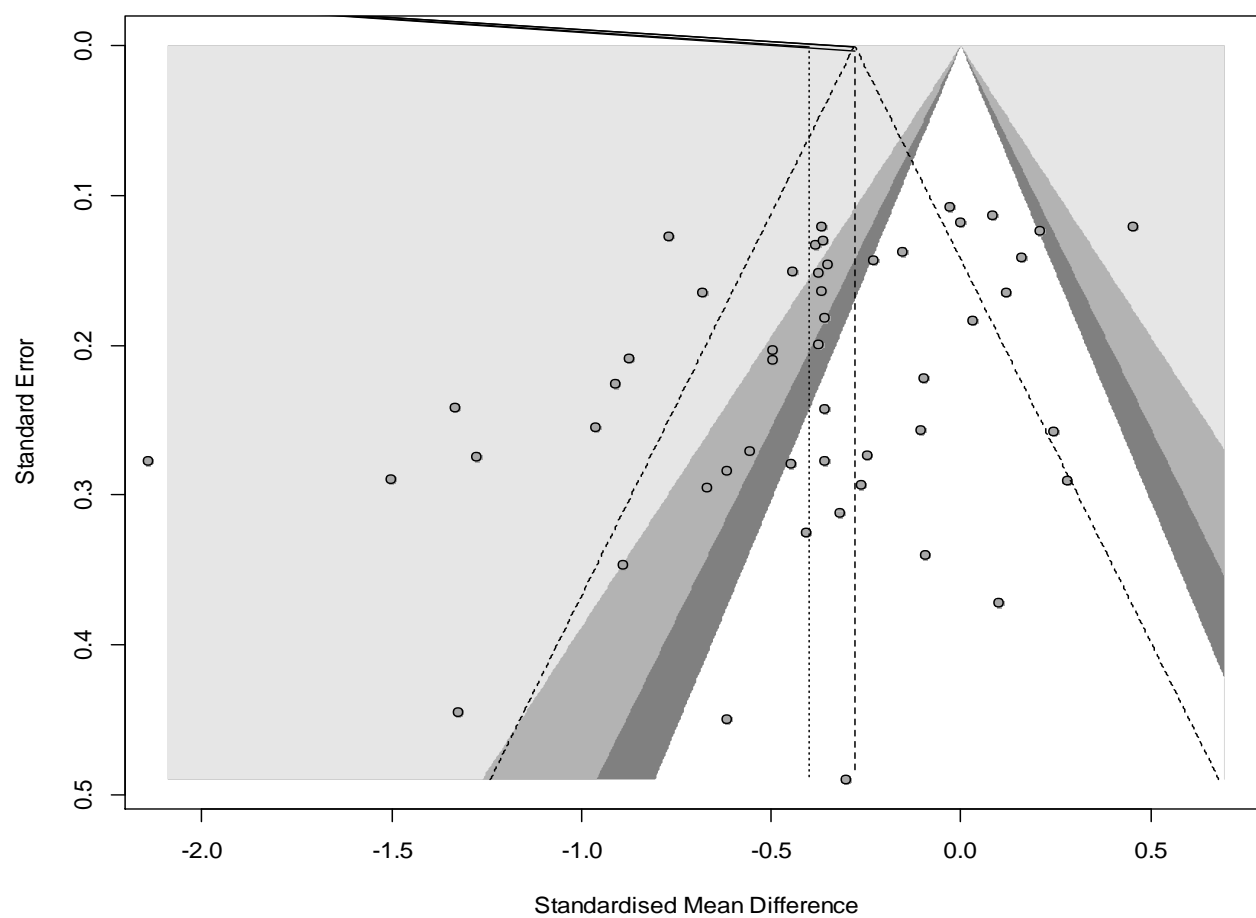

**j. Glycated haemoglobin (HbA1c)**

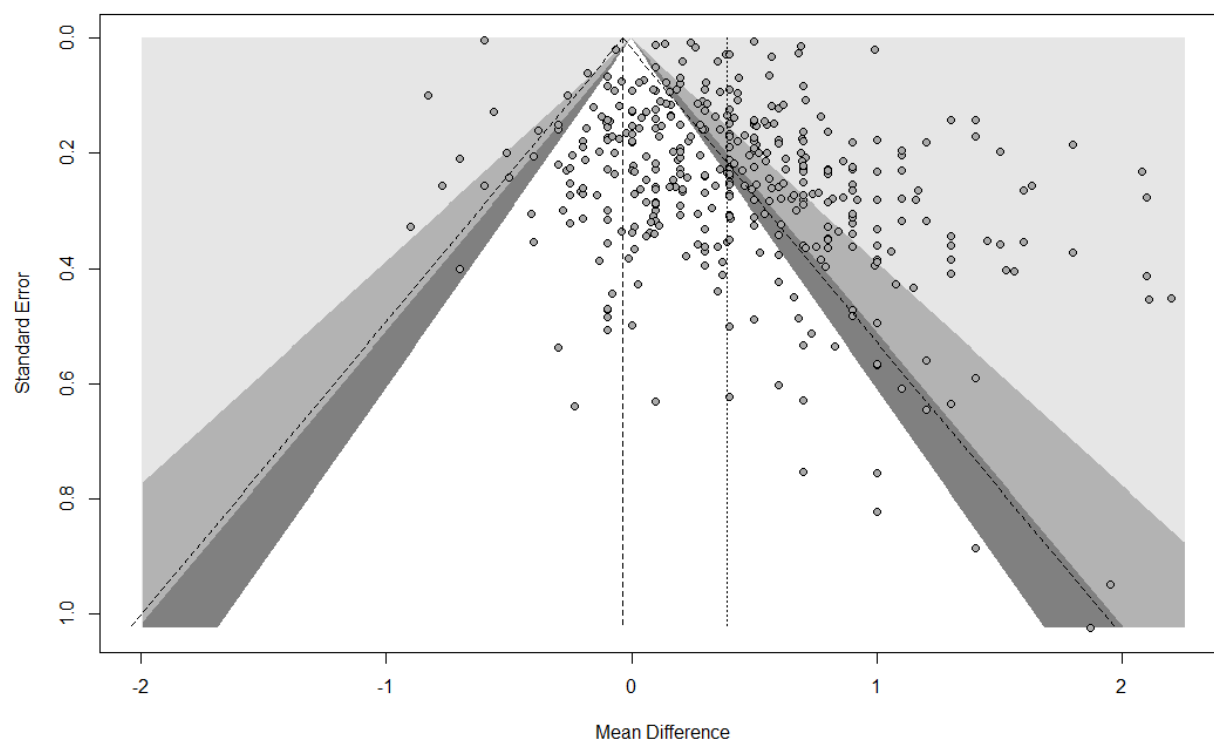

**k. Body Mass Index (BMI)**

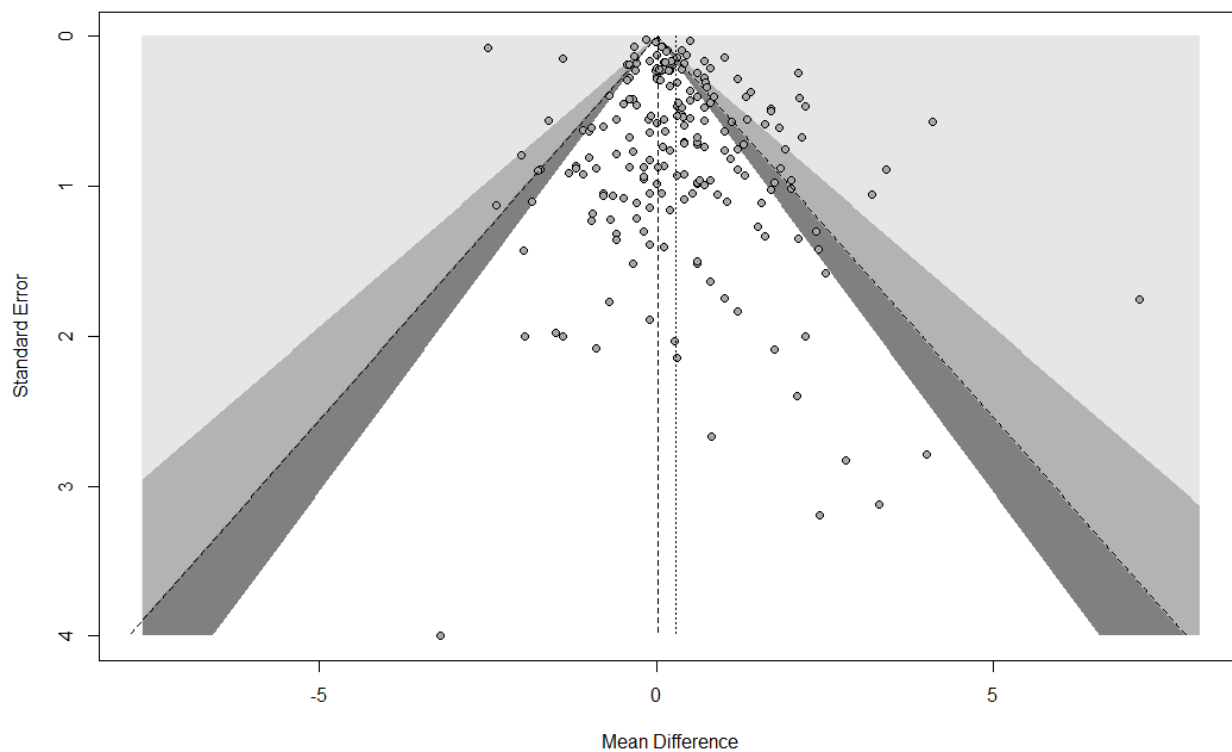

**l. Waist size**

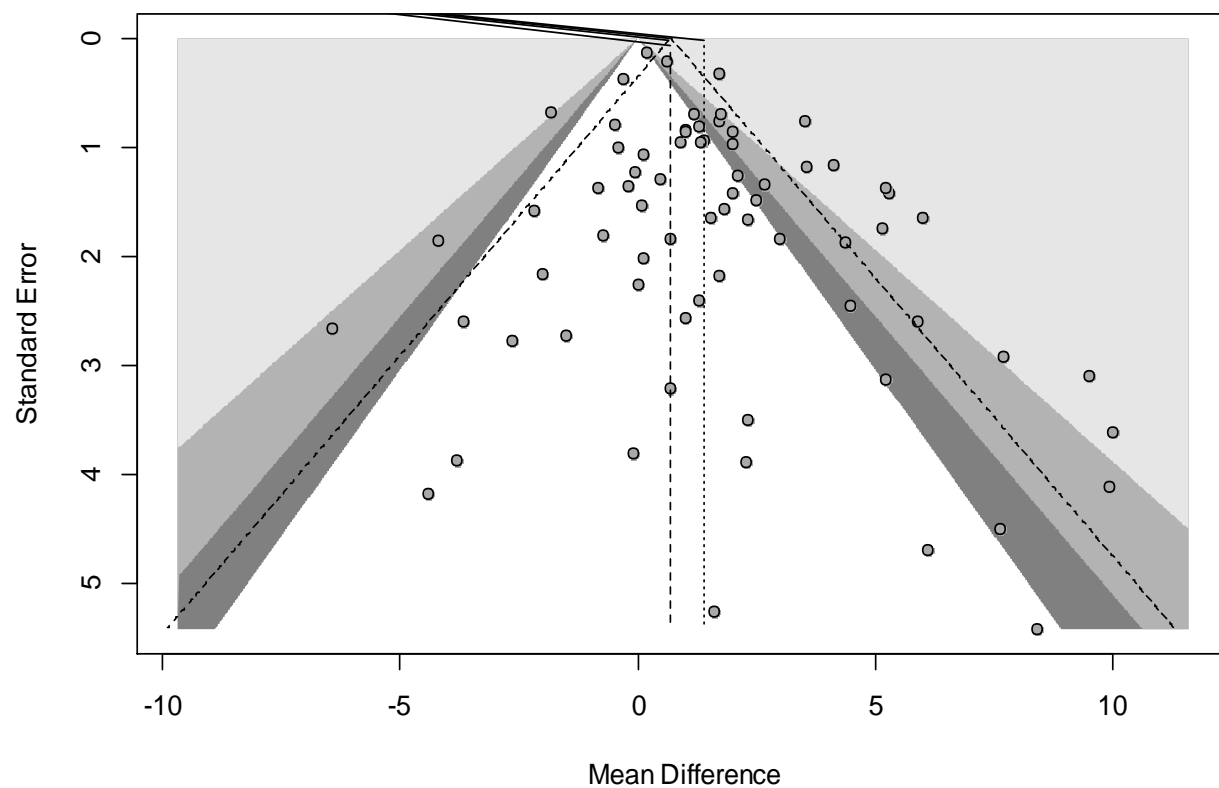

m. Weight

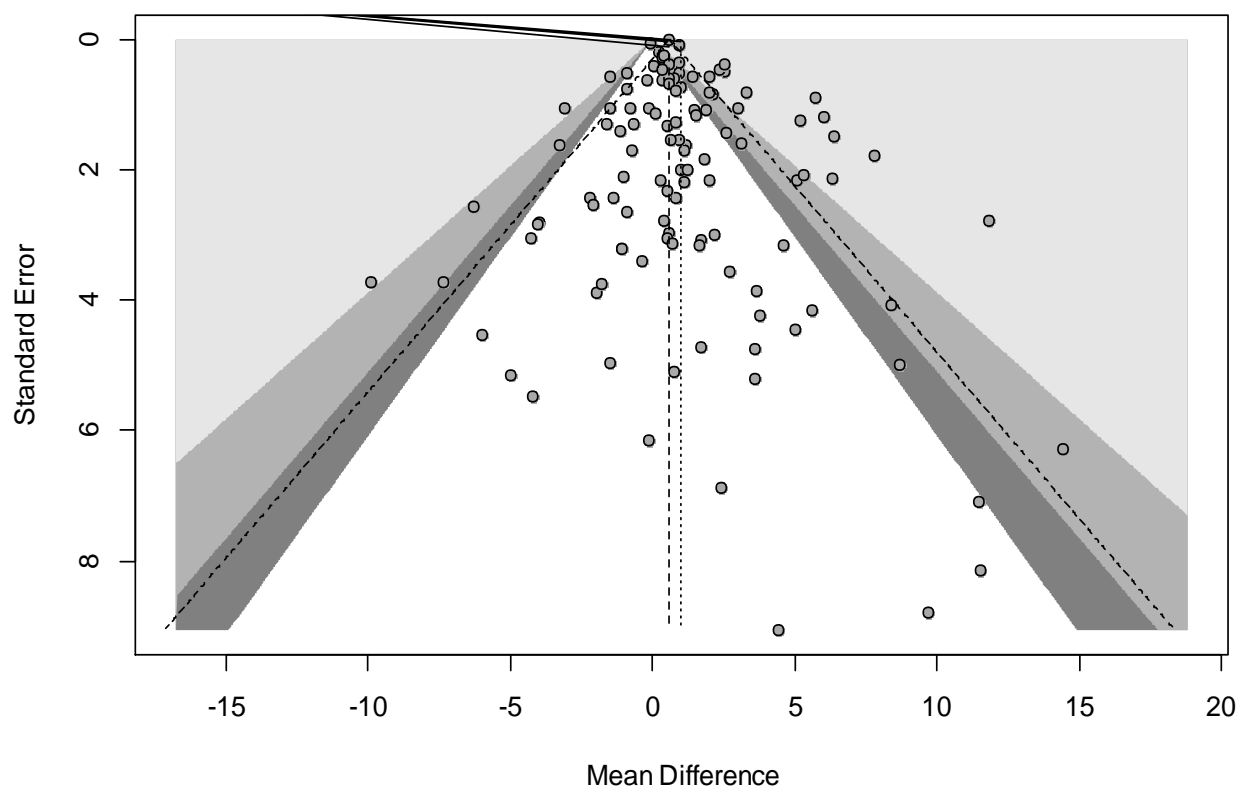

n. Systolic lood pressure

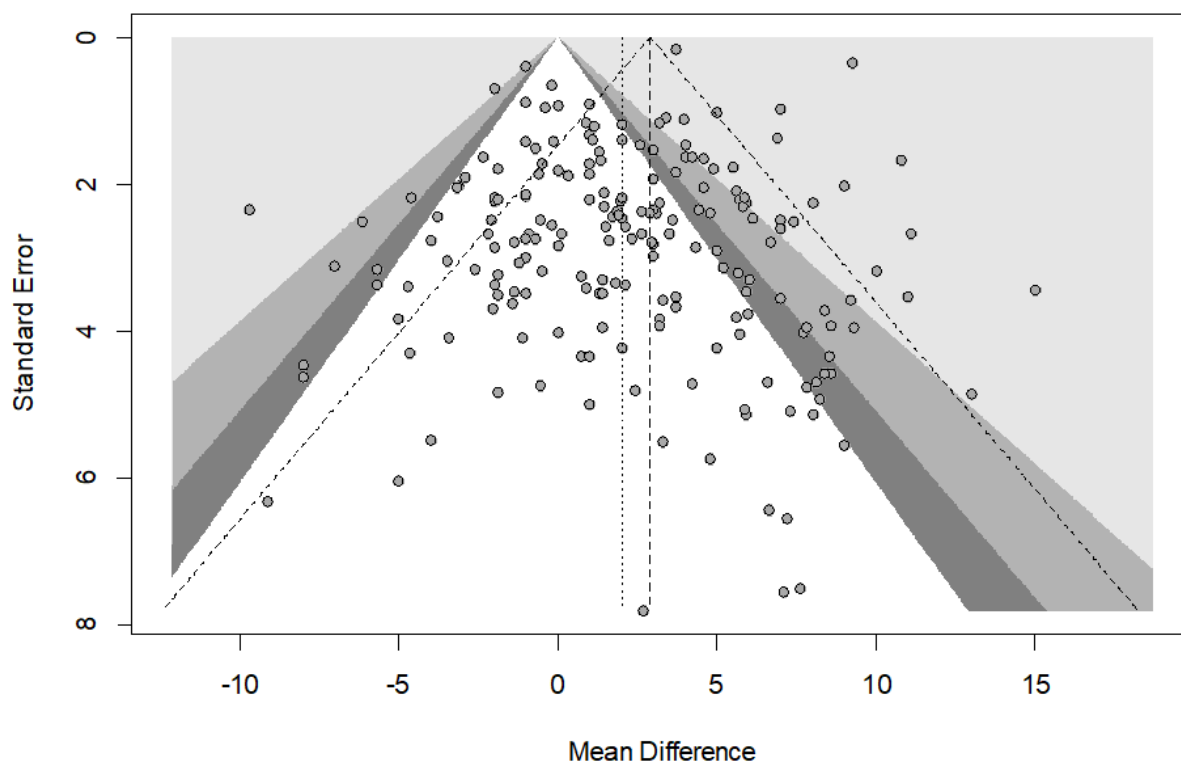

**o. Diastolic blood pressure**

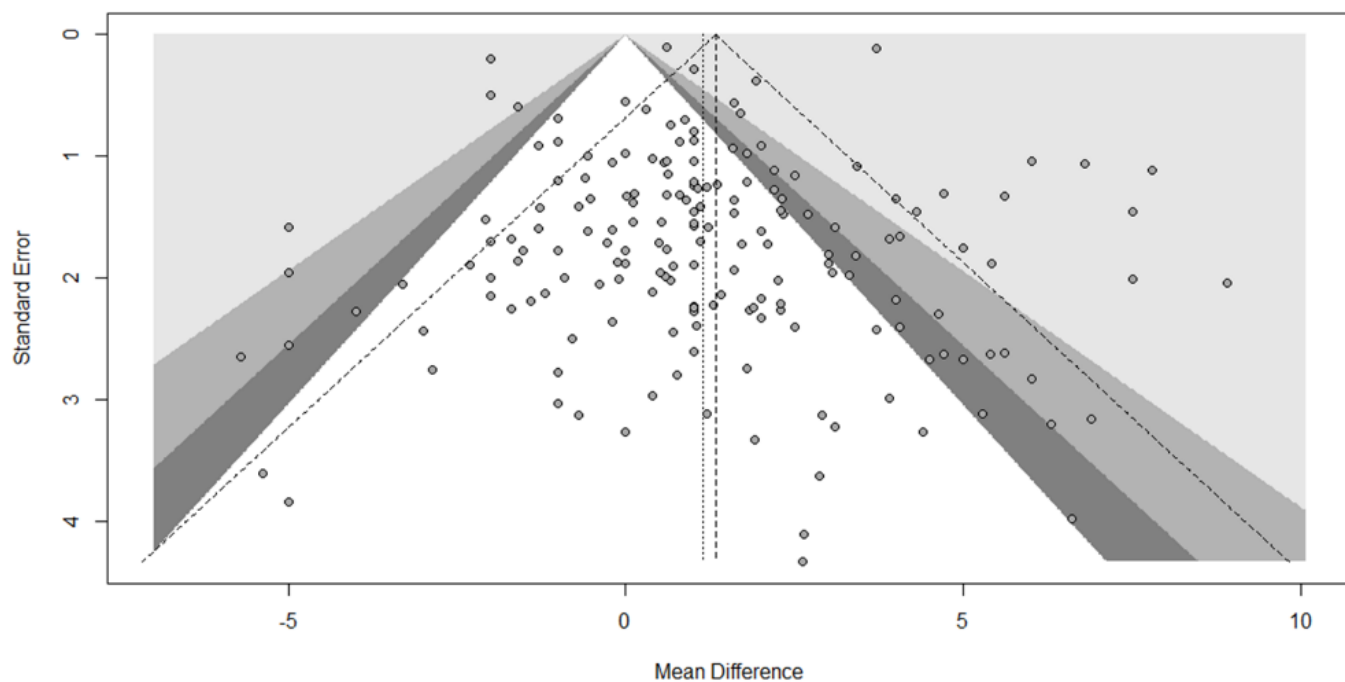

**p. LDL cholesterol**

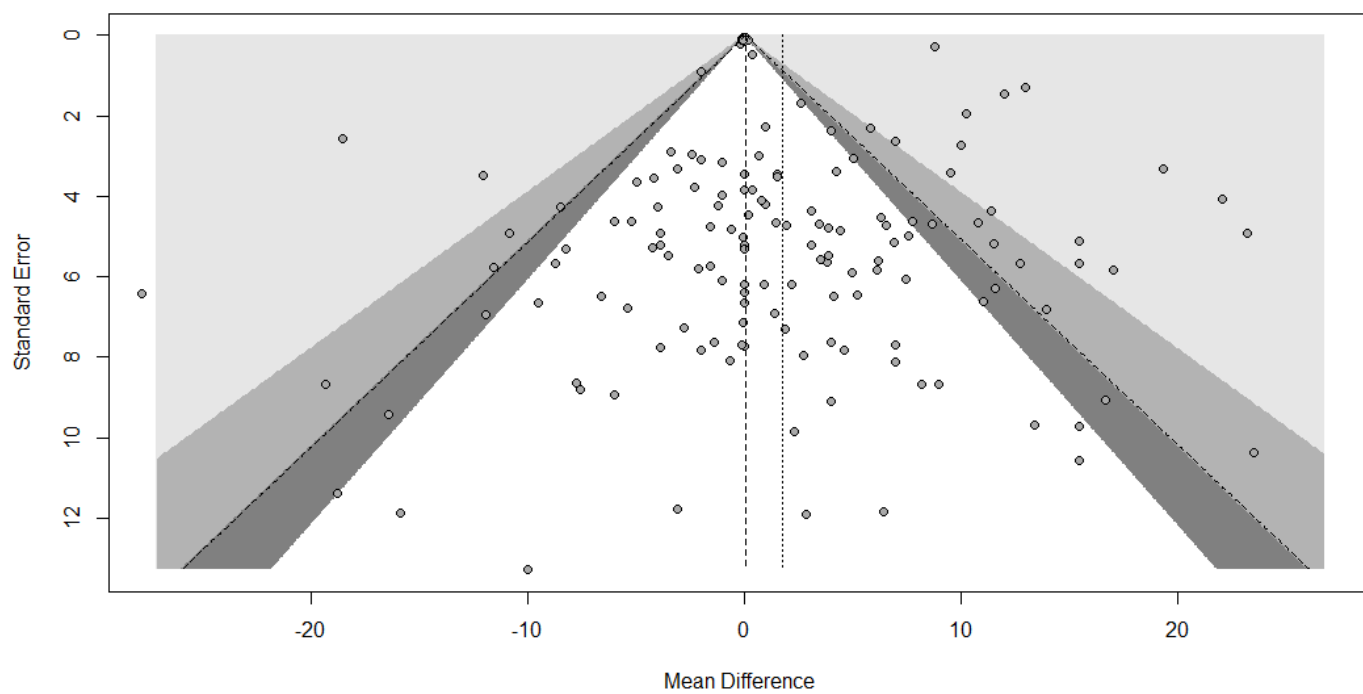



q. HDL cholesterol

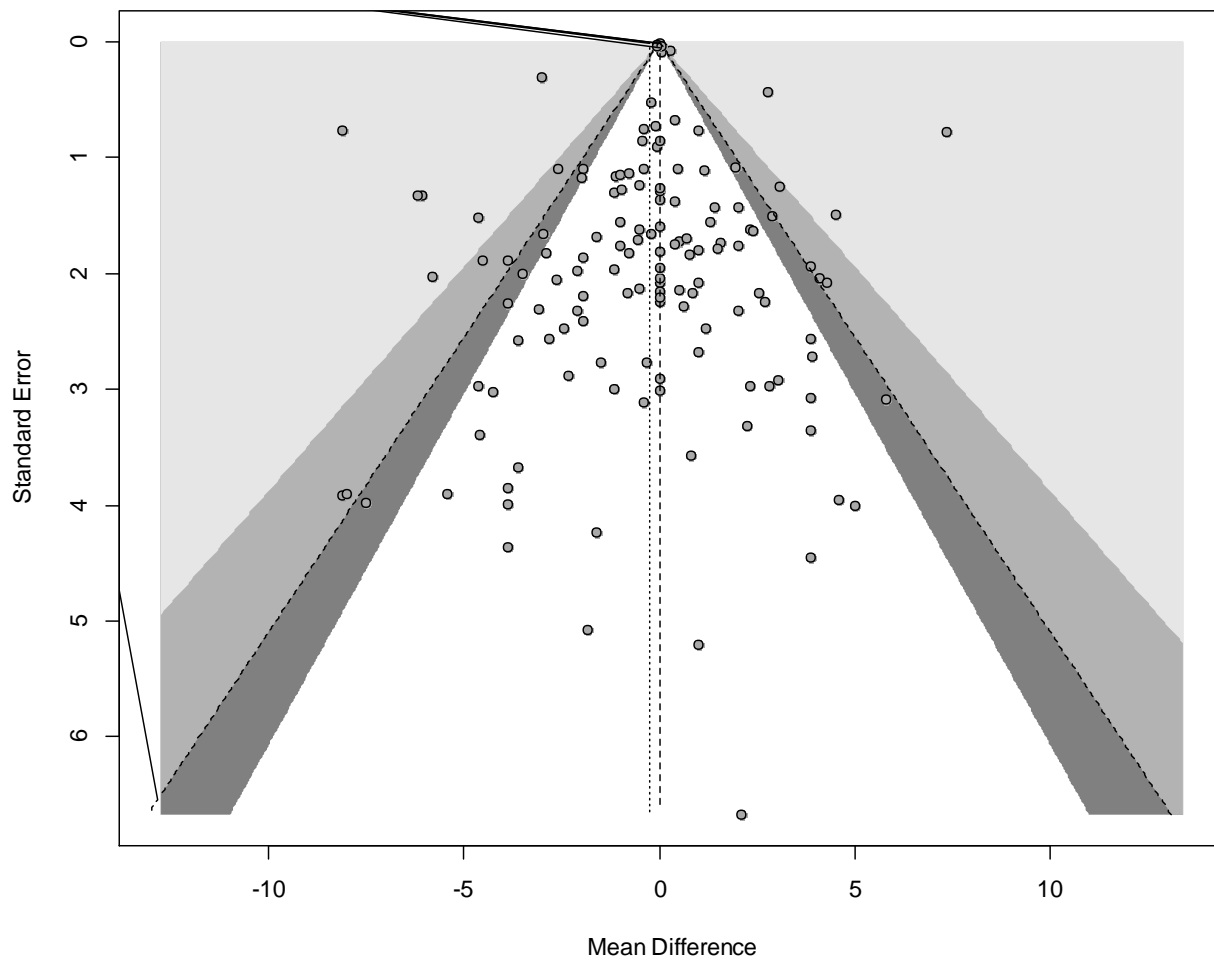

r. Triglycerides

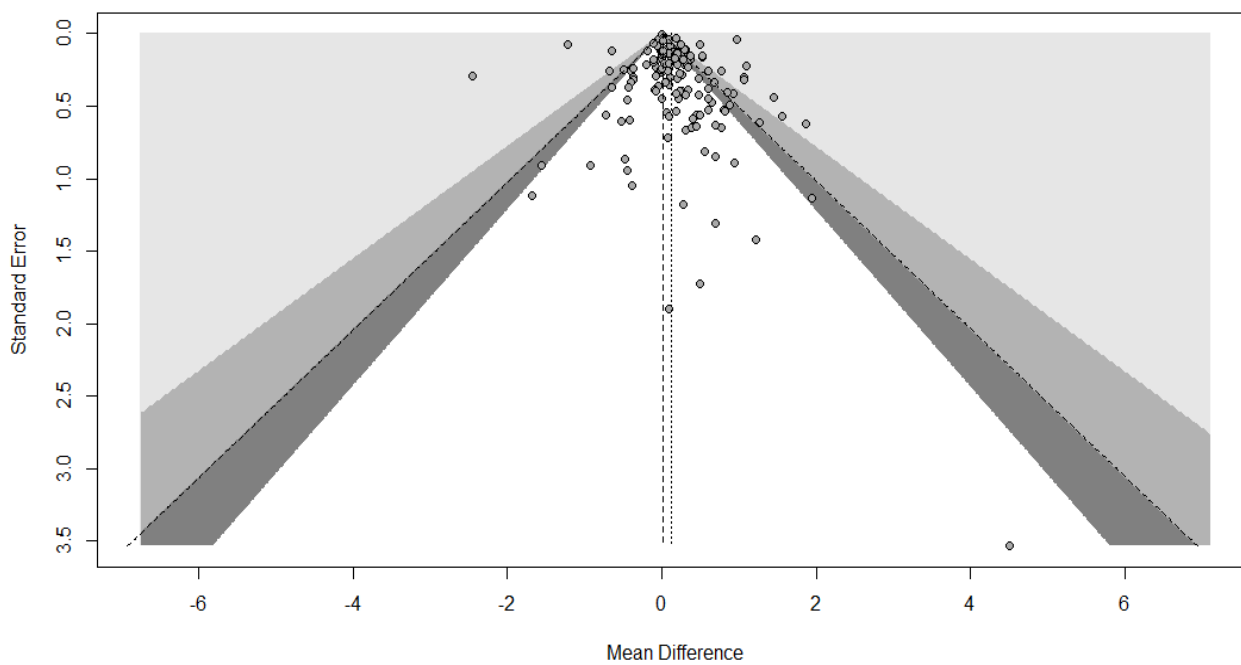

s. Total cholesterol

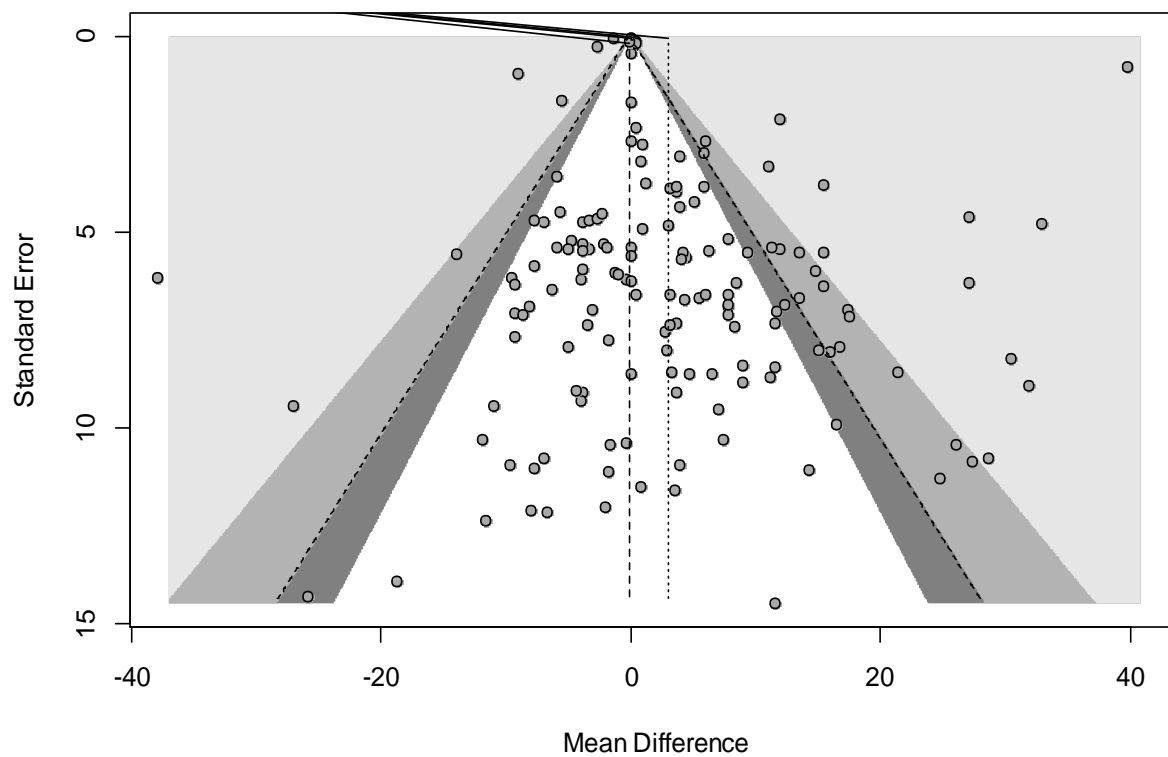

t. Quality of life

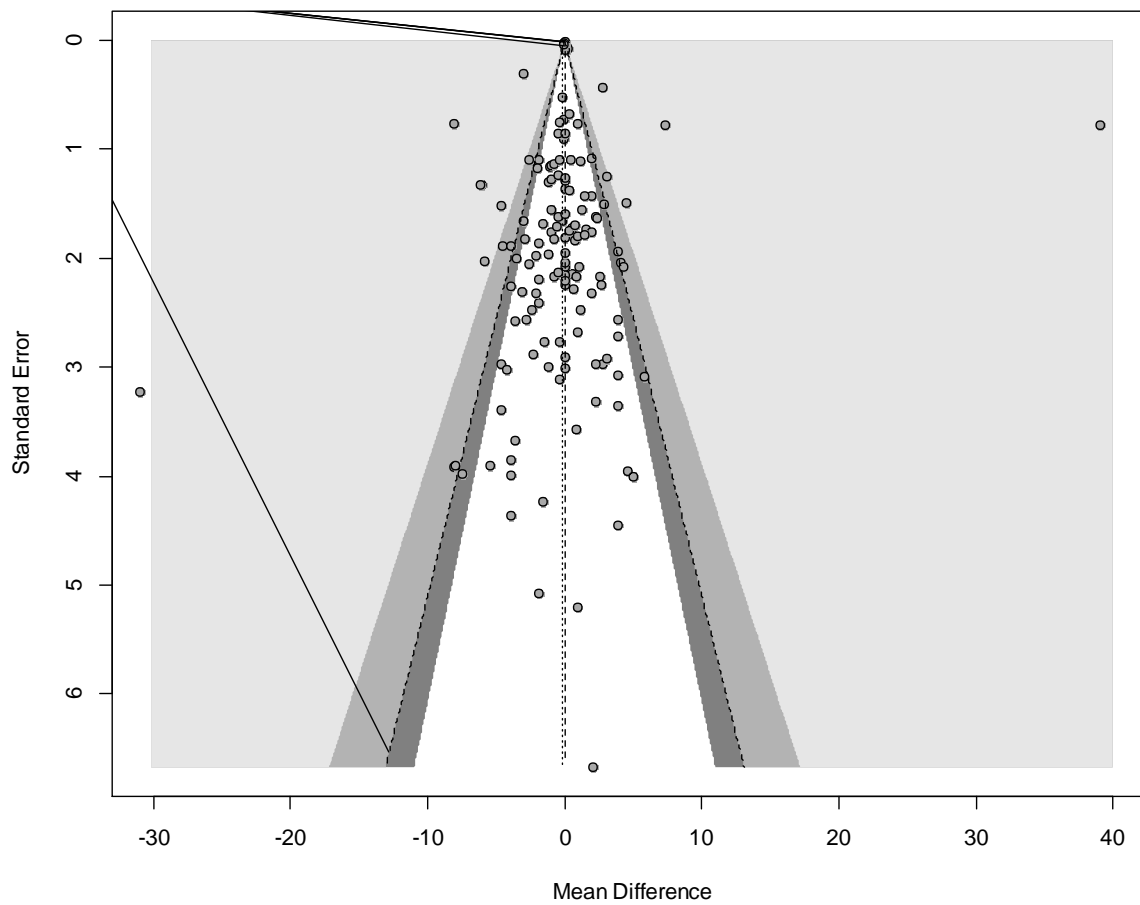

u. Psychological distress

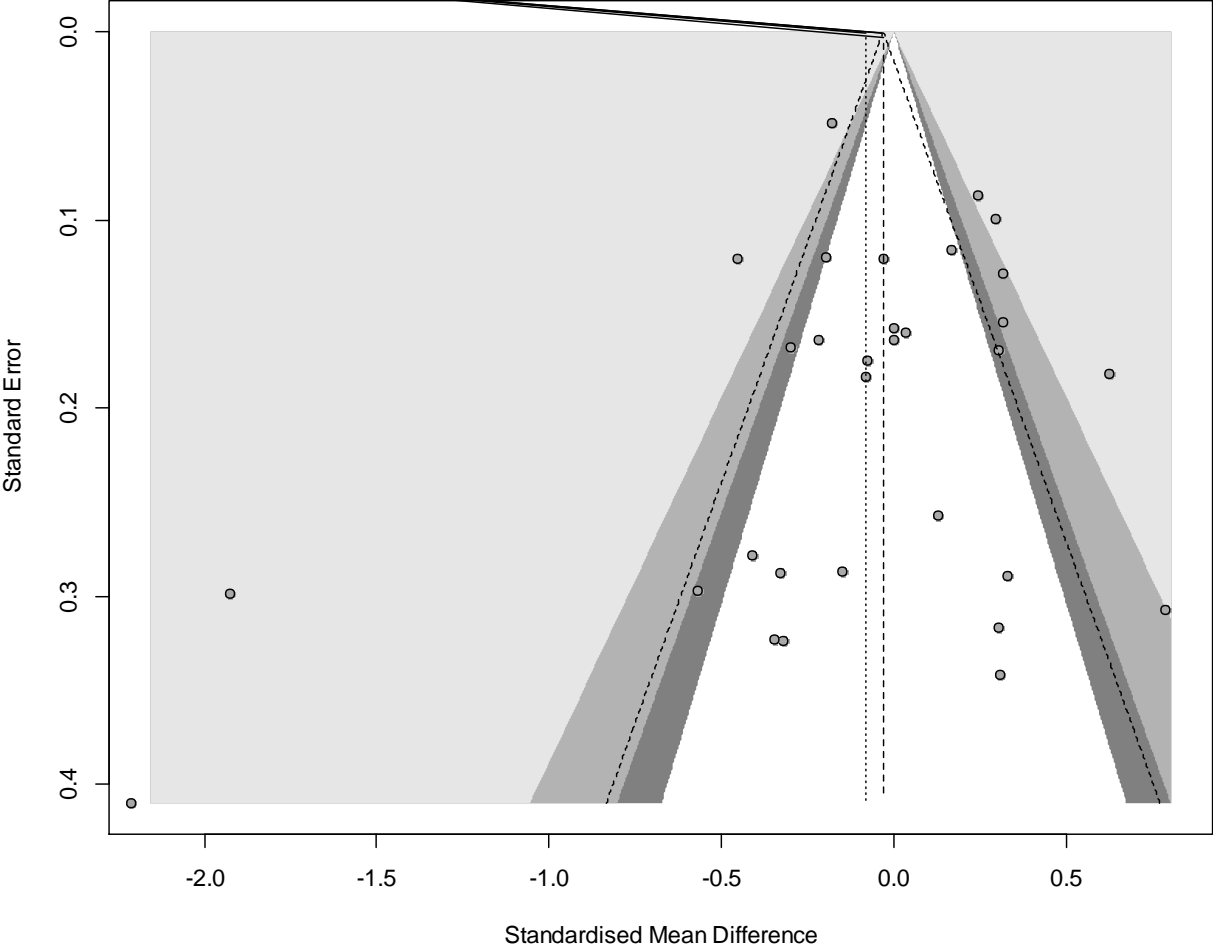

Supplement: s1 [file s1]
