# Supplementary material for: Exploring the Effectiveness of Self-Management Interventions in Type 2 Diabetes: A Systematic Review and Network Meta-Analysis
Source: MDPI journal article supplement (doi:10.3390/healthcare12010027), 2023-12-22

## Appendix A. Search Strategy, Inclusion Criteria & Flow chart

### Search Strategy

#### PubMed (Search Date December 5th, 2018)

| Search | Query                                                                                                                                                                                                                                                                                                                                                                                                                                                                                                                                                                                                                                                                                                                                                                                                                                                                                                                                                                                                                                                                                                                                                                                                                                                                                                                                                                                                                                                                                                                                                                                                                                                                                                                                                                                                                                                                                                                                                                                                                                                                                          | Items found |
|--------|------------------------------------------------------------------------------------------------------------------------------------------------------------------------------------------------------------------------------------------------------------------------------------------------------------------------------------------------------------------------------------------------------------------------------------------------------------------------------------------------------------------------------------------------------------------------------------------------------------------------------------------------------------------------------------------------------------------------------------------------------------------------------------------------------------------------------------------------------------------------------------------------------------------------------------------------------------------------------------------------------------------------------------------------------------------------------------------------------------------------------------------------------------------------------------------------------------------------------------------------------------------------------------------------------------------------------------------------------------------------------------------------------------------------------------------------------------------------------------------------------------------------------------------------------------------------------------------------------------------------------------------------------------------------------------------------------------------------------------------------------------------------------------------------------------------------------------------------------------------------------------------------------------------------------------------------------------------------------------------------------------------------------------------------------------------------------------------------|-------------|
| #3     | #1 AND #2 AND #3 Filters: Publication date from 2010/01/01                                                                                                                                                                                                                                                                                                                                                                                                                                                                                                                                                                                                                                                                                                                                                                                                                                                                                                                                                                                                                                                                                                                                                                                                                                                                                                                                                                                                                                                                                                                                                                                                                                                                                                                                                                                                                                                                                                                                                                                                                                     | 6988        |
| #3     | ("Clinical Trials as Topic"[Mesh] OR "Randomized Controlled Trial" [pt] OR "Controlled Clinical Trial" [pt] OR randomized [tiab] OR randomly[tiab] OR placebo[tiab] OR trial[ti]) NOT (animals[mh] NOT humans[mh])                                                                                                                                                                                                                                                                                                                                                                                                                                                                                                                                                                                                                                                                                                                                                                                                                                                                                                                                                                                                                                                                                                                                                                                                                                                                                                                                                                                                                                                                                                                                                                                                                                                                                                                                                                                                                                                                             | 1166396     |
| #2     | "Self Care"[Mesh] OR "Self-Management"[Mesh] OR "Power (Psychology)"[Mesh] OR "Health Education"[Mesh] OR "Patient Participation"[Mesh] OR "Decision Making"[Mesh] OR "Telemedicine"[Mesh] OR self-administration*[tiab] OR self-care[tiab] OR self efficac*[tiab] OR self-manag*[tiab] OR selfmanag*[tiab] OR self-monitor*[tiab] OR selfmonitor*[tiab] OR self-diagnos*[tiab] OR selfdiagnos*[tiab] OR self-assess*[tiab] OR selfassess*[tiab] OR self-direct*[tiab] OR selfdirect*[tiab] OR self-help*[tiab] OR empower*[tiab] OR enablement[tiab] OR health education[tiab] OR patient education[tiab] OR patient participation[tiab] OR coach*[tiab] OR health promot*[tiab] OR ((community[tiab] OR peer[tiab]) AND (support*[tiab] OR advice*[tiab] OR monitor*[tiab] OR train*[tiab] OR instruction*[tiab] OR intervention*[tiab] OR consult*[tiab] OR assist*[tiab] OR educat*[tiab] OR information*[tiab] OR skill*[tiab])) OR group support*[tiab] OR group intervention*[tiab] OR group advice*[tiab] OR group monitor*[tiab] OR group train*[tiab] OR training group*[tiab] OR group instruct*[tiab] OR group assist*[tiab] OR group educat*[tiab] OR group inform*[tiab] OR group skill*[tiab] OR ((patient[tiab] OR patients[tiab]) AND (centered[tiab] OR centred[tiab] OR focus*[tiab] of directed[tiab] OR coach*[tiab] OR engage*[tiab] OR involve*[tiab] OR orient*[tiab] OR participat*[tiab])) OR ((patient[tiab] OR patients[tiab]) AND (educat*[tiab] OR train*[tiab] OR instruct*[tiab] OR teach*[tiab])) OR (management*[tiab] AND (plan[tiab] OR program*[tiab] OR disease[tiab])) OR (symptom*[tiab] AND (management[tiab] OR directed[tiab] OR focus*[tiab])) OR ((personalized[tiab] OR personalized[tiab]) AND care[tiab]) OR telemedicine[tiab] OR eHealth[tiab] OR e-Health[tiab] OR mHealth[tiab] OR m-Health[tiab] OR shared decision*[tiab] OR sharing decision*[tiab] OR informed decision*[tiab] OR informed choice*[tiab] or decision aid*[tiab] OR ((share*[ti] OR sharing*[ti] OR informed*[ti]) AND (decision*[ti] OR deciding*[ti] OR choice*[ti])) | 1902834     |
| #1     | "Diabetes Mellitus"[Mesh] OR diabet*[tiab]                                                                                                                                                                                                                                                                                                                                                                                                                                                                                                                                                                                                                                                                                                                                                                                                                                                                                                                                                                                                                                                                                                                                                                                                                                                                                                                                                                                                                                                                                                                                                                                                                                                                                                                                                                                                                                                                                                                                                                                                                                                     | 626033      |

#### Embase (Search Date December 5th, 2018)

| Search | Query                                                                                                                                          | Items found |
|--------|------------------------------------------------------------------------------------------------------------------------------------------------|-------------|
|        | Voor export #6 not pmids                                                                                                                       | 2602        |
| #6     | #5 NOT ('chapter'/it OR 'conference abstract'/it OR 'conference review'/it OR 'editorial'/it OR 'letter'/it OR 'note'/it OR 'short survey'/it) | 5322        |

| <i>Search</i> | <i>Query</i>                                                                                                                                                                                                                                                                                                                                                                                                                                                                                                                                                                                                                                                                                                                                                                                                                                                                                                                                                                                                                                                                                                                                                                                                                                                                                                                                                                                                                                                                                                                                                                                                                                                                                                                                                                                                            | <i>Items found</i> |
|---------------|-------------------------------------------------------------------------------------------------------------------------------------------------------------------------------------------------------------------------------------------------------------------------------------------------------------------------------------------------------------------------------------------------------------------------------------------------------------------------------------------------------------------------------------------------------------------------------------------------------------------------------------------------------------------------------------------------------------------------------------------------------------------------------------------------------------------------------------------------------------------------------------------------------------------------------------------------------------------------------------------------------------------------------------------------------------------------------------------------------------------------------------------------------------------------------------------------------------------------------------------------------------------------------------------------------------------------------------------------------------------------------------------------------------------------------------------------------------------------------------------------------------------------------------------------------------------------------------------------------------------------------------------------------------------------------------------------------------------------------------------------------------------------------------------------------------------------|--------------------|
| #5            | #1 AND #2 AND #3 AND [2010-2019]/py                                                                                                                                                                                                                                                                                                                                                                                                                                                                                                                                                                                                                                                                                                                                                                                                                                                                                                                                                                                                                                                                                                                                                                                                                                                                                                                                                                                                                                                                                                                                                                                                                                                                                                                                                                                     | 8004               |
| #4            | #1 AND #2 AND #3                                                                                                                                                                                                                                                                                                                                                                                                                                                                                                                                                                                                                                                                                                                                                                                                                                                                                                                                                                                                                                                                                                                                                                                                                                                                                                                                                                                                                                                                                                                                                                                                                                                                                                                                                                                                        | 10233              |
| #3            | ('clinical trial (topic)/exp OR randomized:ab,ti,kw OR randomly:ab,ti,kw OR placebo:ab,ti,kw OR trial:ti) NOT ([animals]/lim NOT [humans]/lim)                                                                                                                                                                                                                                                                                                                                                                                                                                                                                                                                                                                                                                                                                                                                                                                                                                                                                                                                                                                                                                                                                                                                                                                                                                                                                                                                                                                                                                                                                                                                                                                                                                                                          | 1266571            |
| #2            | 'self care'/exp OR 'coping behavior'/exp OR 'drug self administration'/exp OR 'self monitoring'/exp OR 'empowerment'/exp OR 'health education'/exp OR 'patient participation'/exp OR 'shared decision making'/exp OR 'telehealth'/exp OR 'self administration*':ab,ti,kw OR 'self care':ab,ti,kw OR 'self efficac*':ab,ti,kw OR 'self manag*':ab,ti,kw OR selfmanag*:ab,ti,kw OR 'self monitor*':ab,ti,kw OR selfmonitor*:ab,ti,kw OR 'self diagnos*':ab,ti,kw OR selfdiagnos*:ab,ti,kw OR 'self assess*':ab,ti,kw OR selfassess*:ab,ti,kw OR 'self direct*':ab,ti,kw OR selfdirect*:ab,ti,kw OR 'self help*':ab,ti,kw OR empower*:ab,ti,kw OR enablement:ab,ti,kw OR 'health education':ab,ti,kw OR 'patient education':ab,ti,kw OR 'patient participation':ab,ti,kw OR coach*:ab,ti,kw OR 'health promot*':ab,ti,kw OR (((group OR peer) NEAR/3 (support* OR advice* OR monitor* OR intervention* OR train* OR instruction* OR consult* OR assist* OR educat* OR information* OR skill*)):ab,ti,kw) OR (((patient OR patients) NEAR/3 (centered OR centred OR focus* OR directed OR coach* OR engage* OR involve* OR orient* OR participat*)):ab,ti,kw) OR (((patient OR patients) NEAR/3 (educat* OR train* OR instruct* OR teach*)):ab,ti,kw) OR ((management* NEAR/3 (plan OR program* OR disease)):ab,ti,kw) OR ((symptom* NEAR/3 (management OR directed OR focus*)):ab,ti,kw) OR (((personalized OR personalized) NEAR/3 care):ab,ti,kw) OR telemedicine:ab,ti,kw OR ehealth:ab,ti,kw OR 'e health':ab,ti,kw OR mhealth:ab,ti,kw OR 'm health':ab,ti,kw OR 'shared decision*':ab,ti,kw OR 'sharing decision*':ab,ti,kw OR 'informed decision*':ab,ti,kw OR 'informed choice*':ab,ti,kw OR 'decision aid*':ab,ti,kw OR (((share* OR sharing* OR informed*) NEAR/3 (decision* OR deciding* OR choice*)):ab,ti,kw) | 971257             |
| #1            | 'diabetes mellitus'/exp OR diabet*:ab,ti,kw                                                                                                                                                                                                                                                                                                                                                                                                                                                                                                                                                                                                                                                                                                                                                                                                                                                                                                                                                                                                                                                                                                                                                                                                                                                                                                                                                                                                                                                                                                                                                                                                                                                                                                                                                                             | 1041731            |

#### Embase and psycINFO (Search Date December 5th, 2018)

| <i>Search</i> | <i>Query</i>                                                                                                                                                                                      | <i>Items found</i> |
|---------------|---------------------------------------------------------------------------------------------------------------------------------------------------------------------------------------------------|--------------------|
| S5            | S1 AND S2 AND S3<br><b>Limiters</b> - Publication Year: 2010-2018                                                                                                                                 | 826                |
| S4            | S1 AND S2 AND S3                                                                                                                                                                                  | 1186               |
| S3            | DE "Clinical Trials" OR TI (randomized OR randomly OR placebo OR trial) OR AB (randomized OR randomly OR placebo) OR KW (randomized OR randomly OR placebo OR trial) NOT (PO Animal NOT PO Human) | 165196             |

| Search | Query                                                                                                                                                                                                                                                                                                                                                                                                                                                                                                                                                                                                                                                                                                                                                                                                                                                                                                                                                                                                                                                                                                                                                                                                                                                                                                                                                                                                                                                                                                                                                                                                                                                                                                                                                                                                                                                                                                                                                                                                                                                                                                                                                                                                                                                                                                                                                                                                                                                                                                                                                                                                                                                                                                                                                                                                                                                                                                                                                                                                                                                                                                                                                                                                                                                                                                                                                                                                                                                                                                                                                                                                                                                                                                                                                                                                                     | Items found |
|--------|---------------------------------------------------------------------------------------------------------------------------------------------------------------------------------------------------------------------------------------------------------------------------------------------------------------------------------------------------------------------------------------------------------------------------------------------------------------------------------------------------------------------------------------------------------------------------------------------------------------------------------------------------------------------------------------------------------------------------------------------------------------------------------------------------------------------------------------------------------------------------------------------------------------------------------------------------------------------------------------------------------------------------------------------------------------------------------------------------------------------------------------------------------------------------------------------------------------------------------------------------------------------------------------------------------------------------------------------------------------------------------------------------------------------------------------------------------------------------------------------------------------------------------------------------------------------------------------------------------------------------------------------------------------------------------------------------------------------------------------------------------------------------------------------------------------------------------------------------------------------------------------------------------------------------------------------------------------------------------------------------------------------------------------------------------------------------------------------------------------------------------------------------------------------------------------------------------------------------------------------------------------------------------------------------------------------------------------------------------------------------------------------------------------------------------------------------------------------------------------------------------------------------------------------------------------------------------------------------------------------------------------------------------------------------------------------------------------------------------------------------------------------------------------------------------------------------------------------------------------------------------------------------------------------------------------------------------------------------------------------------------------------------------------------------------------------------------------------------------------------------------------------------------------------------------------------------------------------------------------------------------------------------------------------------------------------------------------------------------------------------------------------------------------------------------------------------------------------------------------------------------------------------------------------------------------------------------------------------------------------------------------------------------------------------------------------------------------------------------------------------------------------------------------------------------------------------|-------------|
| S2     | <p>DE ("Self-Care Skills" OR "Self-Efficacy" OR "Drug Self Administration" OR "Coping Behavior" OR "Empowerment" OR "Telemedicine" OR "Health Education" OR "Health Promotion" OR "Client Participation") OR TI ("self administration*" OR "self care" OR "self efficac*" OR "self manag*" OR selfmanag* OR "self monitor*" OR selfmonitor* OR "self diagnos*" OR selfdiagnos* OR "self assess*" OR selfassess* OR "self direct*" OR selfdirect* OR "self help*" OR empower* OR enablement OR "health education" OR "patient education" OR "patient participation" OR coach* OR "health promot*" OR (((group OR peer) N3 (support* OR advice* OR monitor* OR intervention* OR train* OR instruction* OR consult* OR assist* OR educat* OR information* OR skill*))) OR (((patient OR patients) N3 (centered OR centred OR focus* OR directed OR coach* OR engage* OR involve* OR orient* OR participat*))) OR (((patient OR patients) N3 (educat* OR train* OR instruct* OR teach*))) OR ((management* N3 (plan OR program* OR disease))) OR ((symptom* N3 (management OR directed OR focus*))) OR (((personalized OR personalized) N3 care)) OR telemedicine OR ehealth OR "e health" OR mhealth OR "m health" OR "shared decision*" OR "sharing decision*" OR "informed decision*" OR "informed choice*" OR "decision aid*" OR (((share* OR sharing* OR informed*) N3 (decision* OR deciding* OR choice*))) OR AB ("self administration*" OR "self care" OR "self efficac*" OR "self manag*" OR selfmanag* OR "self monitor*" OR selfmonitor* OR "self diagnos*" OR selfdiagnos* OR "self assess*" OR selfassess* OR "self direct*" OR selfdirect* OR "self help*" OR empower* OR enablement OR "health education" OR "patient education" OR "patient participation" OR coach* OR "health promot*" OR (((group OR peer) N3 (support* OR advice* OR monitor* OR intervention* OR train* OR instruction* OR consult* OR assist* OR educat* OR information* OR skill*))) OR (((patient OR patients) N3 (centered OR centred OR focus* OR directed OR coach* OR engage* OR involve* OR orient* OR participat*))) OR (((patient OR patients) N3 (educat* OR train* OR instruct* OR teach*))) OR ((management* N3 (plan OR program* OR disease))) OR ((symptom* N3 (management OR directed OR focus*))) OR (((personalized OR personalized) N3 care)) OR telemedicine OR ehealth OR "e health" OR mhealth OR "m health" OR "shared decision*" OR "sharing decision*" OR "informed decision*" OR "informed choice*" OR "decision aid*" OR (((share* OR sharing* OR informed*) N3 (decision* OR deciding* OR choice*))) OR KW ("self administration*" OR "self care" OR "self efficac*" OR "self manag*" OR selfmanag* OR "self monitor*" OR selfmonitor* OR "self diagnos*" OR selfdiagnos* OR "self assess*" OR selfassess* OR "self direct*" OR selfdirect* OR "self help*" OR empower* OR enablement OR "health education" OR "patient education" OR "patient participation" OR coach* OR "health promot*" OR (((group OR peer) N3 (support* OR advice* OR monitor* OR intervention* OR train* OR instruction* OR consult* OR assist* OR educat* OR information* OR skill*))) OR (((patient OR patients) N3 (centered OR centred OR focus* OR directed OR coach* OR engage* OR involve* OR orient* OR participat*))) OR (((patient OR patients) N3 (educat* OR train* OR instruct* OR teach*))) OR ((management* N3 (plan OR program* OR disease))) OR ((symptom* N3 (management OR directed OR focus*))) OR (((personalized OR personalized) N3 care)) OR telemedicine OR ehealth OR "e health" OR mhealth OR "m health" OR "shared decision*" OR "sharing decision*" OR "informed decision*" OR "informed choice*" OR "decision aid*" OR (((share* OR sharing* OR informed*) N3 (decision* OR deciding* OR choice*)))</p> | 410390      |
| S1     | DE ("Diabetes Mellitus" OR "Type 2 Diabetes") OR TI diabet* OR AB diabet* OR KW diabet*                                                                                                                                                                                                                                                                                                                                                                                                                                                                                                                                                                                                                                                                                                                                                                                                                                                                                                                                                                                                                                                                                                                                                                                                                                                                                                                                                                                                                                                                                                                                                                                                                                                                                                                                                                                                                                                                                                                                                                                                                                                                                                                                                                                                                                                                                                                                                                                                                                                                                                                                                                                                                                                                                                                                                                                                                                                                                                                                                                                                                                                                                                                                                                                                                                                                                                                                                                                                                                                                                                                                                                                                                                                                                                                                   | 29185       |

## Cinahl (Search Date December 5th, 2018)

| Search | Query                                                                                                                                                                                                                                                                                                                                                                                                                                                                                                                                                                                                                                                                                                                                                                                                                                                                                                                                                                                                                                                                                                                                                                                                                                                                                                                                                                                                                                                                                                                                                                                                                                                                                                                                                                                                                                                                                                                                                                                                                                                                                                                                                                                                                                                                                                                                                                                                                                                                                                                                         | Items found |
|--------|-----------------------------------------------------------------------------------------------------------------------------------------------------------------------------------------------------------------------------------------------------------------------------------------------------------------------------------------------------------------------------------------------------------------------------------------------------------------------------------------------------------------------------------------------------------------------------------------------------------------------------------------------------------------------------------------------------------------------------------------------------------------------------------------------------------------------------------------------------------------------------------------------------------------------------------------------------------------------------------------------------------------------------------------------------------------------------------------------------------------------------------------------------------------------------------------------------------------------------------------------------------------------------------------------------------------------------------------------------------------------------------------------------------------------------------------------------------------------------------------------------------------------------------------------------------------------------------------------------------------------------------------------------------------------------------------------------------------------------------------------------------------------------------------------------------------------------------------------------------------------------------------------------------------------------------------------------------------------------------------------------------------------------------------------------------------------------------------------------------------------------------------------------------------------------------------------------------------------------------------------------------------------------------------------------------------------------------------------------------------------------------------------------------------------------------------------------------------------------------------------------------------------------------------------|-------------|
| S5     | S1 AND S2 AND S3<br><b>Limiters</b> - Publication Year: 2010-2018, academic journals                                                                                                                                                                                                                                                                                                                                                                                                                                                                                                                                                                                                                                                                                                                                                                                                                                                                                                                                                                                                                                                                                                                                                                                                                                                                                                                                                                                                                                                                                                                                                                                                                                                                                                                                                                                                                                                                                                                                                                                                                                                                                                                                                                                                                                                                                                                                                                                                                                                          | 2229        |
| S4     | S1 AND S2 AND S3                                                                                                                                                                                                                                                                                                                                                                                                                                                                                                                                                                                                                                                                                                                                                                                                                                                                                                                                                                                                                                                                                                                                                                                                                                                                                                                                                                                                                                                                                                                                                                                                                                                                                                                                                                                                                                                                                                                                                                                                                                                                                                                                                                                                                                                                                                                                                                                                                                                                                                                              | 4310        |
| S3     | MH "Clinical Trials+" OR TI (randomized OR randomly OR placebo OR trial) OR AB (randomized OR randomly OR placebo) NOT (MH "Animals" NOT MH "Human")                                                                                                                                                                                                                                                                                                                                                                                                                                                                                                                                                                                                                                                                                                                                                                                                                                                                                                                                                                                                                                                                                                                                                                                                                                                                                                                                                                                                                                                                                                                                                                                                                                                                                                                                                                                                                                                                                                                                                                                                                                                                                                                                                                                                                                                                                                                                                                                          | 377603      |
| S2     | MH ("Self Care+" OR "Self-Efficacy" OR "Coping" OR "Empowerment" OR "Telehealth+") OR "Health Education" OR "Consumer Participation") OR TI ("self administration*" OR "self care" OR "self efficac*" OR "self manag*" OR selfmanag* OR "self monitor*" OR selfmonitor* OR "self diagnos*" OR selfdiagnos* OR "self assess*" OR selfassess* OR "self direct*" OR selfdirect* OR "self help*" OR empower* OR enablement OR "health education" OR "patient education" OR "patient participation" OR coach* OR "health promot*" OR (((group OR peer) N3 (support* OR advice* OR monitor* OR intervention* OR train* OR instruction* OR consult* OR assist* OR educat* OR information* OR skill*))) OR (((patient OR patients) N3 (centered OR centred OR focus* OR directed OR coach* OR engage* OR involve* OR orient* OR participat*))) OR (((patient OR patients) N3 (educat* OR train* OR instruct* OR teach*))) OR ((management* N3 (plan OR program* OR disease))) OR ((symptom* N3 (management OR directed OR focus*))) OR (((personalized OR personalized) N3 care)) OR telemedicine OR ehealth OR "e health" OR mhealth OR "m health" OR "shared decision*" OR "sharing decision*" OR "informed decision*" OR "informed choice*" OR "decision aid*" OR (((share* OR sharing* OR informed*) N3 (decision* OR deciding* OR choice*))) OR AB ("self administration*" OR "self care" OR "self efficac*" OR "self manag*" OR selfmanag* OR "self monitor*" OR selfmonitor* OR "self diagnos*" OR selfdiagnos* OR "self assess*" OR selfassess* OR "self direct*" OR selfdirect* OR "self help*" OR empower* OR enablement OR "health education" OR "patient education" OR "patient participation" OR coach* OR "health promot*" OR (((group OR peer) N3 (support* OR advice* OR monitor* OR intervention* OR train* OR instruction* OR consult* OR assist* OR educat* OR information* OR skill*))) OR (((patient OR patients) N3 (centered OR centred OR focus* OR directed OR coach* OR engage* OR involve* OR orient* OR participat*))) OR (((patient OR patients) N3 (educat* OR train* OR instruct* OR teach*))) OR ((management* N3 (plan OR program* OR disease))) OR ((symptom* N3 (management OR directed OR focus*))) OR (((personalized OR personalized) N3 care)) OR telemedicine OR ehealth OR "e health" OR mhealth OR "m health" OR "shared decision*" OR "sharing decision*" OR "informed decision*" OR "informed choice*" OR "decision aid*" OR (((share* OR sharing* OR informed*) N3 (decision* OR deciding* OR choice*))) | 472850      |
| S1     | MH "Diabetes Mellitus+" OR TI diabet* OR AB diabet*                                                                                                                                                                                                                                                                                                                                                                                                                                                                                                                                                                                                                                                                                                                                                                                                                                                                                                                                                                                                                                                                                                                                                                                                                                                                                                                                                                                                                                                                                                                                                                                                                                                                                                                                                                                                                                                                                                                                                                                                                                                                                                                                                                                                                                                                                                                                                                                                                                                                                           | 186369      |

## Search History Cochrane Central Trial Register (Search Date December 5th, 2018)

| Search | Query                                                                                                                                                                                                                                                                                                                                                                                                                                                                                                                                                                                                                                                                                                                                                                                                                                                                                                                                                                                                                                                                                                                                                                                                                                                                                   | Items found |
|--------|-----------------------------------------------------------------------------------------------------------------------------------------------------------------------------------------------------------------------------------------------------------------------------------------------------------------------------------------------------------------------------------------------------------------------------------------------------------------------------------------------------------------------------------------------------------------------------------------------------------------------------------------------------------------------------------------------------------------------------------------------------------------------------------------------------------------------------------------------------------------------------------------------------------------------------------------------------------------------------------------------------------------------------------------------------------------------------------------------------------------------------------------------------------------------------------------------------------------------------------------------------------------------------------------|-------------|
| #4     | #3 Limits Publication Year from 2010 to 2018, with Cochrane Library publication date from Jan 2010 to Dec 2018,                                                                                                                                                                                                                                                                                                                                                                                                                                                                                                                                                                                                                                                                                                                                                                                                                                                                                                                                                                                                                                                                                                                                                                         | 7386        |
| #3     | #1 AND #2                                                                                                                                                                                                                                                                                                                                                                                                                                                                                                                                                                                                                                                                                                                                                                                                                                                                                                                                                                                                                                                                                                                                                                                                                                                                               |             |
| #2     | (self NEXT administration* OR self NEXT care OR self NEXT efficac* OR self NEXT manag* OR selfmanag* OR self NEXT monitor* OR selfmonitor* OR self NEXT diagnos* OR selfdiagnos* OR self NEXT assess* OR selfassess* OR self NEXT direct* OR selfdirect* OR self NEXT help* OR empower* OR enablement OR health NEXT education OR patient NEXT education OR patient NEXT participation OR coach* OR health NEXT promot* OR (((group OR peer) NEAR/3 (support* OR advice* OR monitor* OR intervention* OR train* OR instruction* OR consult* OR assist* OR educat* OR information* OR skill*))) OR (((patient OR patients) NEAR/3 (centered OR centred OR focus* OR directed OR coach* OR engage* OR involve* OR orient* OR participat*)) OR (((patient OR patients) NEAR/3 (educat* OR train* OR instruct* OR teach*)) OR ((management* NEAR/3 (plan OR program* OR disease))) OR ((symptom* NEAR/3 (management OR directed OR focus*))) OR (((personalized OR personalized) NEAR/3 care)) OR telemedicine OR ehealth OR "e-health" OR mhealth OR "m-health" OR shared NEXT decision* OR sharing NEXT decision* OR informed NEXT decision* OR informed NEXT choice* OR decision NEXT aid* OR (((share* OR sharing* OR informed*) NEAR/3 (decision* OR deciding* OR choice*)))):ab,ti,kw | 120971      |
| #1     | diabet*:ab,ti,kw                                                                                                                                                                                                                                                                                                                                                                                                                                                                                                                                                                                                                                                                                                                                                                                                                                                                                                                                                                                                                                                                                                                                                                                                                                                                        | 64482       |

## Inclusion Criteria

|                     |                                                                                                     |
|---------------------|-----------------------------------------------------------------------------------------------------|
| <b>Population</b>   | Adults (>18 years) with Diabetes Type-II (T2DM)                                                     |
| <b>Intervention</b> | Self-management support techniques, types of support, mode of delivery, type of provider, intensity |
| <b>Comparison</b>   | Usual care or any self-management interventions                                                     |
| <b>Outcomes</b>     | Not to be specified at the level of literature search                                               |
| <b>Study design</b> | RCTs (quasi-randomized studies were excluded)                                                       |

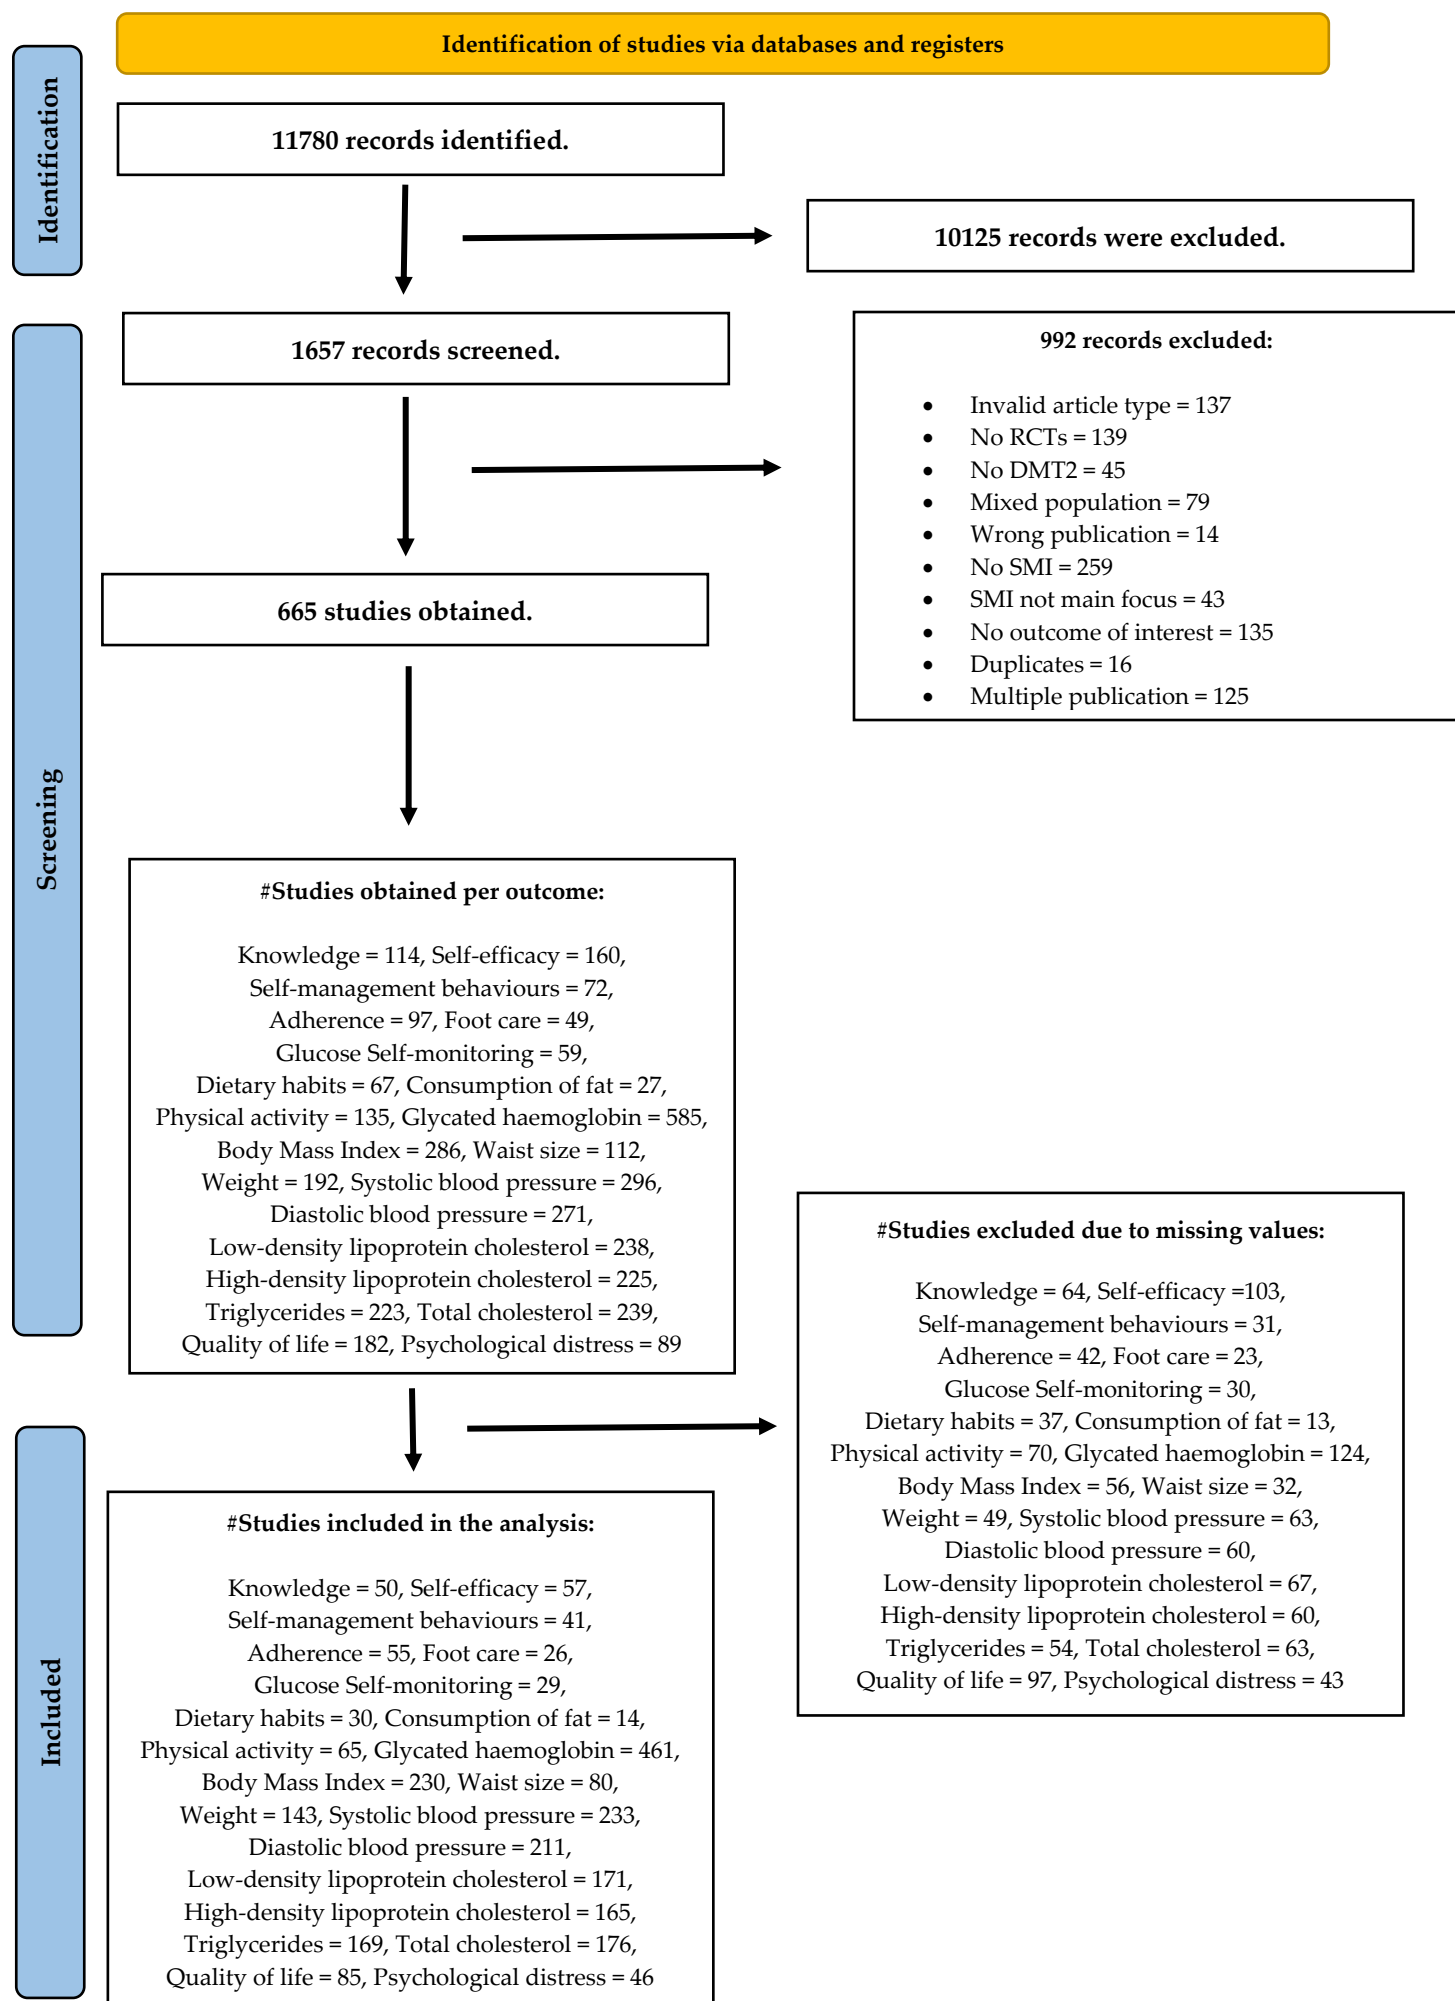

Supplement: s1 [file s1]
