# Supplementary material for: Exploring the Effectiveness of Self-Management Interventions in Type 2 Diabetes: A Systematic Review and Network Meta-Analysis
Source: MDPI journal article supplement (doi:10.3390/healthcare12010027), 2023-12-22
Supplement: s1 [file s1]

## Appendix B. Meta-Analysis Results (Fixed- and Random-effects models)

| Outcome                              | # Studies | Fixed-effects TE<br>[95% CI] | Random-effects TE<br>[95% CI] | $\tau^2$ (I <sup>2</sup> ) | Prediction<br>Interval | P-value<br>for<br>Egger's<br>test |
|--------------------------------------|-----------|------------------------------|-------------------------------|----------------------------|------------------------|-----------------------------------|
| Knowledge                            | 41        | SMD 0.73 [0.67, 0.79]        | SMD 0.92 [0.69, 1.16]         | 0.49 (92% )                | [-0.51, 2.35]          | 0.002                             |
| Adherence                            | 49        | SMD 0.14 [0.09, 0.19]        | SMD 0.34 [0.10, 0.57]         | 0.34 (91% )                | [-0.88, 1.55]          | 0.02                              |
| Body Mass Index (kg/m <sup>2</sup> ) | 204       | MD -0.01 [-0.04, 0.01]       | MD -0.28 [-0.41, -0.15]       | 0.51 (91% )                | [-1.69, 1.13]          | 0.03                              |
| Care Satisfaction                    | 12        | SMD 0.44 [0.35, 0.52]        | SMD 0.60 [0.00, 1.20]         | 0.79 (95% )                | [-1.46, 2.67]          | 0.45                              |
| Consumption of Fat                   | 12        | MD -0.41 [-0.50, -0.32]      | MD -0.43 [-0.76, -0.10]       | 0.26 (89% )                | [-1.60, 0.75]          | 0.76                              |
| Diastolic Blood Pressure<br>(mmHg)   | 178       | MD -1.33 [-1.44, -1.22]      | MD -1.14 [-1.50, -0.78]       | 3.09 (86% )                | [-4.63, 2.35]          | 0.33                              |
| Dietary Habits                       | 26        | SMD 0.30 [0.23, 0.37]        | SMD 0.33 [0.10, 0.56]         | 0.25 (83% )                | [-0.73, 1.39]          | 0.53                              |
| Footcare                             | 22        | SMD 0.68 [0.61, 0.76]        | SMD 0.78 [0.38, 1.18]         | 0.73 (95% )                | [-1.05, 2.61]          | 0.43                              |
| Glucose Self-monitoring              | 24        | SMD 0.39 [0.32, 0.46]        | SMD 0.57 [0.23, 0.92]         | 0.58 (90% )                | [-1.04, 2.19]          | 0.04                              |
| HbA1c (%)                            | 386       | MD 0.04 [0.03, 0.04]         | MD -0.39 [-0.44, -0.34]       | 0.17 (99% )                | [-1.20, 0.42]          | <0.001                            |
| HDL cholesterol (mg/dL)              | 136       | MD 0.00 [-0.02, 0.01]        | MD 0.27 [-0.16, 0.69]         | 3.67 (76% )                | [-3.54, 4.08]          | 0.33                              |
| LDL cholesterol (mg/dL)              | 146       | MD -0.07 [-0.12, -0.01]      | MD -1.78 [-3.02, -0.53]       | 32.94 (90% )               | [-13.19, 9.63]         | 0.03                              |
| Physical Activity                    | 49        | SMD 0.28 [0.23, 0.33]        | SMD 0.40 [0.26, 0.54]         | 0.18 (81% )                | [-0.46, 1.25]          | 0.002                             |
| Psychological Distress               | 31        | SMD 0.03 [-0.02, 0.08]       | SMD 0.08 [-0.12, 0.29]        | 0.21 (82% )                | [-0.88, 1.05]          | 0.63                              |
| Quality of Life                      | 73        | SMD 0.15 [0.11, 0.19]        | SMD 0.24 [0.07, 0.41]         | 0.47 (90% )                | [-1.14, 1.61]          | 0.09                              |
| Self-efficacy                        | 53        | SMD 0.27 [0.22, 0.31]        | SMD 0.37 [0.17, 0.57]         | 0.49 (92% )                | [-1.05, 1.79]          | 0.11                              |
| Self-management<br>Behaviours        | 36        | SMD 0.50 [0.44, 0.56]        | SMD 0.63 [0.44, 0.82]         | 0.28 (89% )                | [-0.46, 1.71]          | 0.01                              |
| Systolic Blood Pressure<br>(mmHg)    | 199       | MD -2.90 [-3.10, -2.70]      | MD -2.04 [-2.60, -1.48]       | 8.45 (80% )                | [-7.80, 3.72]          | 0.005                             |
| Total Cholesterol<br>(mg/dL)         | 149       | MD 0.14 [0.08, 0.19]         | MD -3.01 [-4.71, -1.31]       | 74.14 (96% )               | [-20.10, 14.09]        | 0.06                              |
| Triglycerides (mg/dL)                | 145       | MD -0.01 [-0.02, -0.00]      | MD -0.12 [-0.20, -0.04]       | 0.13 (89% )                | [-0.83, 0.59]          | 0.02                              |
| Waist size (cm)                      | 71        | MD -0.69 [-0.87, -0.52]      | MD -1.39 [-1.97, -0.80]       | 2.3 (66% )                 | [-4.47, 1.70]          | 0.002                             |
| Weight (kg)                          | 115       | MD -0.59 [-0.62, -0.57]      | MD -0.98 [-1.45, -0.51]       | 2.68 (74% )                | [-4.26, 2.30]          | 0.16                              |
