# Supplementary material for: Exploring the Effectiveness of Self-Management Interventions in Type 2 Diabetes: A Systematic Review and Network Meta-Analysis
Source: MDPI journal article supplement (doi:10.3390/healthcare12010027), 2023-12-22
Supplement: s1 [file s1]

## Appendix E-Meta-regression results

Meta-regression according to severity

| Subcategory                                    | Main Category (outcome)    | # studies | TE [95% CI]         | $\tau^2$ (I <sup>2</sup> ) |
|------------------------------------------------|----------------------------|-----------|---------------------|----------------------------|
| <b>Basic empowerment measures</b>              |                            |           |                     |                            |
| <i>Self-management competences</i>             | Knowledge                  | 35        | 0.09 [-0.12, 0.30]  | 0.43 (92%)                 |
|                                                | Self-efficacy              | 40        | 0.24 [-0.01, 0.48]  | 0.41 (94%)                 |
| <b>Adherence to Self-management behaviours</b> |                            |           |                     |                            |
|                                                | Self-management behaviours | 26        | -0.03 [-0.19, 0.14] | 0.15 (84%)                 |
|                                                | Adherence                  | 43        | 0.13 [-0.10, 0.37]  | 0.19 (86%)                 |
|                                                | Foot care                  | 21        | 0.10 [-0.54, 0.74]  | 0.89 (96%)                 |
|                                                | Glucose Self-monitoring    | 25        | -0.49 [-1.04, 0.06] | 0.63 (95%)                 |
|                                                | Dietary habits             | 24        | -0.02 [-0.41, 0.38] | 0.32 (89%)                 |
|                                                | Consumption of fat         | 10        | -0.08 [-0.20, 0.05] | 0.02 (47%)                 |
|                                                | Physical activity          | 44        | -0.02 [-0.23, 0.19] | 0.26 (88%)                 |
| <b>Clinical outcomes (and markers)</b>         |                            |           |                     |                            |
| <i>Glucose management</i>                      | Hb1Ac                      | 368       | -0.01 [-0.01, 0.00] | 0.16 (98%)                 |
| <i>Weight management</i>                       | Body Mass Index (BMI)      | 192       | -0.01 [-0.03, 0.01] | 0.53 (93%)                 |
|                                                | Waist size                 | 70        | 0.10 [-0.07, 0.26]  | 3.10 (81%)                 |
|                                                | Weight                     | 106       | 0.15 [-0.06, 0.36]  | 3.14 (96%)                 |
| <i>Blood Pressure</i>                          | Systolic blood pressure    | 188       | 0.01 [-0.08, 0.09]  | 8.82 (77%)                 |
|                                                | Diastolic blood pressure   | 170       | 0.01 [-0.05, 0.07]  | 3.12 (82%)                 |
| <i>Lipid profile</i>                           | LDL cholesterol            | 134       | -0.09 [-1.24, 1.07] | 32.08 (99%)                |
|                                                | HDL cholesterol            | 131       | -0.30 [-0.68, 0.08] | 2.97 (99%)                 |
|                                                | Triglycerides              | 133       | 0.00 [-0.01, 0.01]  | 0.13 (99%)                 |
|                                                | Total cholesterol          | 146       | 0.04 [-0.20, 0.27]  | 79.02 (100%)               |
| <b>Quality of life</b>                         |                            |           |                     |                            |
|                                                | Quality of life            | 60        | 0.00 [-0.02, 0.01]  | 0.30 (92%)                 |
|                                                | Psychological distress     | 27        | 0.00 [-0.02, 0.01]  | 0.07 (73%)                 |

TE, Treatment Effect; CI; Confidence Interval

Meta-regression according to gender

| Subcategory                                    | Main Category (outcome) | # studies | MD [95% CI]        | $\tau^2$ (I <sup>2</sup> ) |
|------------------------------------------------|-------------------------|-----------|--------------------|----------------------------|
| <b>Basic empowerment measures</b>              |                         |           |                    |                            |
| <i>Self-management competences</i>             | Knowledge               | 8         | -0.03[-0.07, 0.02] | 0.83 (95%)                 |
|                                                | Self-efficacy           | 16        | 0.00[-0.01, 0.01]  | 0.08 (70%)                 |
| <b>Adherence to Self-management behaviours</b> |                         |           |                    |                            |

|                                        |                            |    |                     |             |
|----------------------------------------|----------------------------|----|---------------------|-------------|
|                                        | Self-management behaviours | 9  | 0.00 [-0.02,0.01]   | 0.15 (87%)  |
|                                        | Adherence                  | 9  | -0.01 [-0.02,0.01]  | 0.21 (56%)  |
|                                        | Foot care                  | 8  | -0.01 [-0.08, 0.06] | 0.96 (96%)  |
|                                        | Glucose Self-monitoring    | 5  | -0.04 [-0.09, 0.16] | 2.58 (98%)  |
|                                        | Dietary habits             | 6  | 0.00 [-0.01, 0.01]  | 0.00 (0%)   |
|                                        | Consumption of fat         | 6  | 0.00 [-0.01, 0.00]  | 0.00 (13%)  |
|                                        | Physical activity          | 16 | 0.00 [-0.02, 0.01]  | 0.24 (82%)  |
| <b>Clinical outcomes (and markers)</b> |                            |    |                     |             |
| <i>Glucose Management</i>              | Hb1Ac                      | 72 | 0.00 [0.00, 0.01]   | 0.17 (86%)  |
| <i>Weight management</i>               | Body Mass Index (BMI)      | 40 | 0.03 [0.01, 0.05]   | 0.50 (87%)  |
|                                        | Waist size                 | 14 | 0.08 [-0.05, 0.21]  | 19.98 (80%) |
|                                        | Weight                     | 26 | -0.03 [-0.05, 0.00] | 0.35 (36%)  |
| <i>Blood Pressure</i>                  | Systolic blood pressure    | 39 | 0.06 [-0.02, 0.13]  | 8.69 (72%)  |
|                                        | Diastolic blood pressure   | 34 | 0.05 [0.01, 0.10]   | 3.44 (71%)  |
| <i>Lipid profile</i>                   | LDL Cholesterol            | 25 | 0.13 [-0.07, 0.33]  | 18.88 (96%) |
|                                        | HDL Cholesterol            | 21 | 0.05[-0.01, 0.12]   | 2.52 (95%)  |
|                                        | Triglycerides              | 20 | 0.02 [0.00, 0.04]   | 0.13 (85%)  |
|                                        | Total cholesterol          | 23 | 0.08 [-0.15, 0.31]  | 42.27 (87%) |
| <b>Quality of life</b>                 |                            |    |                     |             |
|                                        | Quality of life            | 13 | 0.02 [-0.01, 0.04]  | 0.30 (93%)  |
|                                        | Psychological distress     | 11 | 0.01 [-0.01, 0.03]  | 0.30 (93%)  |

TE, Treatment Effect; CI; Confidence Interval
